# Supplementary material for: Relationships Between Leaf Carbon and Macronutrients Across Woody Species and Forest Ecosystems Highlight How Carbon Is Allocated to Leaf Structural Function
Source: Front Plant Sci. 2021 Jun 11;12:674932. doi: 10.3389/fpls.2021.674932 (PMC8226226; doi:10.3389/fpls.2021.674932)
Supplement: Supplementary file 2 [file Data_Sheet_2.xlsx]

## Sheet: note
Dataset on the concentrations of C, CS, and five macronutrients (N, P, K, Ca, Mg) of leaves from broadleaved woody species of China, coupled with associated information on geographic location and plant life forms. The dataset consists of 225 species. Species are comprised of 59 genera and 31 families from six sites from broadleaved evergreen forests, 57 genera and 37 families from three sites of …
Shown below is the dataset from species/sites, species of the evergreen, mixed evergreen and deciduous, and deciduous broadleaved forests and sample individuals of Quercus wutaishanica and Betula platyphylla, and cell wall component concentrations of 20 broadleaved trees in China. For those who are interested in these data, please contact Kaixiong Xing (xingkaixiong@163.com)
Abbreviations:		unit
EBF	evergreen broadleaved forest
MDEBF	mixed deciduous and evergreen broadleaved forest
DBF	deciduous broadleaved forest
C	leaf carbon concentration	mg g-1
CS	protein-free leaf carbon content	mg g-1
N	leaf nitrogen concentration	mg g-1
P	leaf phosphorus concentration	mg g-1
K	leaf potassium concentration	mg g-1
Ca	leaf calcium concentration	mg g-1
Mg	leaf magnesium concentraion	mg g-1
MAT	mean annual temperature	℃
MAP	mean annual precipitation	mm
AK	soil available potassium of topsoil (0–0.3 m)	mg kg-1
AN	soil available nitrogen of topsoil (0–0.3 m)	mg kg-1
AP	soil available phosphorus of topsoil (0–0.3 m)	mg kg-1
Ca2+	soil exchangeable Ca2+ of topsoil (0–0.3 m)	me 100g-1
Mg2+	soil exchangeable Mg2+ of topsoil (0–0.3 m)	me 100g-1
pH	soil pH value (H2O) of topsoil (0–0.3 m)	pH units
TotalCW	total cell wall (lignin, cellulose, hemicelloluse, soluable pecin, protopectine and cacium in cell wall) concentration	(mg/g)
Lignin	total lignin concentration	(mg/g)
Celloluse	total cellulose concentration	(mg/g)
Hemicelloluse	total hemicellulose concentration	(mg/g)
Protopectin	total protopectin concentration	(mg/g)
Soluable_pectin	total soluable pectin concentration	(mg/g)
Total_pectin	total pectin concentration	(mg/g)
CaCW	total cacium in cell wall	(mg/g)
CCW	total carbon in cell wall	(mg/g)
Lignin_R	lignin ratio in cell wall	%
Celloluse_R	celloluse ratio in cell wall	%
Hemicelloluse_R	hemicelloluse ratio in cell wall	%
Protopectin_R	pratiootopectin ratio in cell wall	%
Water_soluble_pectin_R	water soluble pectin ratio in cell wall	%
Total_pectin_R	total pectin ratio in cell wall	%
CaCW_R	CaCW ratio in cell wall	%
CCW_R	total carbon ratio in cell wall	%

## Sheet: Specie_traits_by_sites
Samplingsite	Species	speciesbysites	Familyname	Foresttype	leaftype	lifeform	C	CS	N	P	K	Ca	Mg	Individual Numbers	Longitude	Latitude	MAT	MAP	AN	AP	AK	Ca2+	Mg2+	pH
Chenqi village	Betula luminifera	Chenqi village_Betula luminifera	Betulaceae	MDEBF	Deciduous	tree	442.27	428.2	21.08	1.29	10.79	12.01	4.34	1	105.7	26.25	16.359	1129.5	99	2.088	170	0.52	0.1992	6.351
Chenqi village	Brandisia hancei	Chenqi village_Brandisia hancei	Scrophulariaceae	MDEBF	Evergreen	tree	417.85	393.4	27.63	1.15	17.27	31.06	9.93	5	105.7	26.25	16.359	1129.5	99	2.088	170	0.52	0.1992	6.351
Chenqi village	Campylotropis macrocarpa	Chenqi village_Campylotropis macrocarpa	Leguminosae	MDEBF	Deciduous	shrub	465.35	451.3	26.86	1.16	8.55	17.6	3.39	4	105.7	26.25	16.359	1129.5	99	2.088	170	0.52	0.1992	6.351
Chenqi village	Cerasus scopulorum	Chenqi village_Cerasus scopulorum	Rosaceae	MDEBF	Deciduous	tree	450.19	438.4	19.53	1.23	12.88	28.62	5.79	2	105.7	26.25	16.359	1129.5	99	2.088	170	0.52	0.1992	6.351
Chenqi village	Cinnamomum bodinieri	Chenqi village_Cinnamomum bodinieri	Lauraceae	MDEBF	Evergreen	tree	496.16	489.9	22.2	1.34	13.91	13.87	2.78	4	105.7	26.25	16.359	1129.5	99	2.088	170	0.52	0.1992	6.351
Chenqi village	Coriaria nepalensis	Chenqi village_Coriaria nepalensis	Coriariaceae	MDEBF	Deciduous	shrub	455.79	445.9	17.76	0.96	5.05	18.74	5.59	3	105.7	26.25	16.359	1129.5	99	2.088	170	0.52	0.1992	6.351
Chenqi village	Corylus yunnanensis	Chenqi village_Corylus yunnanensis	Betulaceae	MDEBF	Deciduous	shrub	459.13	445.7	24.06	1.15	8.23	26.42	2.52	1	105.7	26.25	16.359	1129.5	99	2.088	170	0.52	0.1992	6.351
Chenqi village	Cotoneaster adpressus	Chenqi village_Cotoneaster adpressus	Rosaceae	MDEBF	Deciduous	shrub	445.96	438.3	12.67	0.82	9.94	22.13	2.84	3	105.7	26.25	16.359	1129.5	99	2.088	170	0.52	0.1992	6.351
Chenqi village	Cotoneaster glabratus	Chenqi village_Cotoneaster glabratus	Rosaceae	MDEBF	Deciduous	shrub	472.8	461.6	24.41	1.4	8.16	12.96	4.71	4	105.7	26.25	16.359	1129.5	99	2.088	170	0.52	0.1992	6.351
Chenqi village	Cotoneaster rhytidophyllus	Chenqi village_Cotoneaster rhytidophyllus	Rosaceae	MDEBF	Deciduous	shrub	467.63	461.6	13.15	0.92	10.37	15.63	3.55	2	105.7	26.25	16.359	1129.5	99	2.088	170	0.52	0.1992	6.351
Chenqi village	Crataegus cuneata	Chenqi village_Crataegus cuneata	Rosaceae	MDEBF	Deciduous	tree	444.35	434.1	16.26	0.96	7.97	22.24	4.72	1	105.7	26.25	16.359	1129.5	99	2.088	170	0.52	0.1992	6.351
Chenqi village	Elaeagnus difficilis	Chenqi village_Elaeagnus difficilis	Elaeagnaceae	MDEBF	Evergreen	shrub	488.7	482.5	18.89	0.86	8.27	8.15	2.05	10	105.7	26.25	16.359	1129.5	99	2.088	170	0.52	0.1992	6.351
Chenqi village	Hypericum monogynum	Chenqi village_Hypericum monogynum	Guttiferae	MDEBF	Deciduous	shrub	440.63	407.6	41.48	1.9	14.22	20.83	7.46	2	105.7	26.25	16.359	1129.5	99	2.088	170	0.52	0.1992	6.351
Chenqi village	Ilex corallina var. aberrans	Chenqi village_Ilex corallina var. aberrans	Aquifoliaceae	MDEBF	Evergreen	tree	498.94	495.3	14.68	0.71	6.93	17.56	2.43	2	105.7	26.25	16.359	1129.5	99	2.088	170	0.52	0.1992	6.351
Chenqi village	Ilex macrocarpa	Chenqi village_Ilex macrocarpa	Aquifoliaceae	MDEBF	Evergreen	tree	489.31	484.5	15.25	0.79	11.16	18.38	2.74	2	105.7	26.25	16.359	1129.5	99	2.088	170	0.52	0.1992	6.351
Chenqi village	Indigofera amblyantha	Chenqi village_Indigofera amblyantha	Leguminosae	MDEBF	Deciduous	shrub	447.47	415.7	42.61	2.17	19.86	15.63	4.59	10	105.7	26.25	16.359	1129.5	99	2.088	170	0.52	0.1992	6.351
Chenqi village	Itea ilicifolia	Chenqi village_Itea ilicifolia	Saxifragaceae	MDEBF	Evergreen	tree	461.01	453.5	14.75	0.91	8.03	19.53	1.37	8	105.7	26.25	16.359	1129.5	99	2.088	170	0.52	0.1992	6.351
Chenqi village	Kalopanax septemlobus	Chenqi village_Kalopanax septemlobus	Araliaceae	MDEBF	Deciduous	tree	485.62	477.2	23.32	1.11	11.98	18.53	2.72	1	105.7	26.25	16.359	1129.5	99	2.088	170	0.52	0.1992	6.351
Chenqi village	Leucaena leucocephala	Chenqi village_Leucaena leucocephala	Leguminosae	MDEBF	Evergreen	tree	465.26	446.2	34.35	1.06	13.71	13	3.62	1	105.7	26.25	16.359	1129.5	99	2.088	170	0.52	0.1992	6.351
Chenqi village	Ligustrum quihoui	Chenqi village_Ligustrum quihoui	Oleaceae	MDEBF	Evergreen	shrub	491.04	483.3	23.95	1.49	12.68	6.27	2.11	1	105.7	26.25	16.359	1129.5	99	2.088	170	0.52	0.1992	6.351
Chenqi village	Lindera communis	Chenqi village_Lindera communis	Lauraceae	MDEBF	Evergreen	tree	497.91	493.7	16.31	1.1	11.73	4.44	0.79	4	105.7	26.25	16.359	1129.5	99	2.088	170	0.52	0.1992	6.351
Chenqi village	Litsea rubescens	Chenqi village_Litsea rubescens	Lauraceae	MDEBF	Deciduous	tree	462.04	449.1	24.1	1.88	14.12	17.57	3.44	5	105.7	26.25	16.359	1129.5	99	2.088	170	0.52	0.1992	6.351
Chenqi village	Machilus cavaleriei	Chenqi village_Machilus cavaleriei	Lauraceae	MDEBF	Evergreen	tree	498.94	495.9	12.43	0.85	4.11	6.18	1.78	8	105.7	26.25	16.359	1129.5	99	2.088	170	0.52	0.1992	6.351
Chenqi village	Maesa insignis	Chenqi village_Maesa insignis	Myrsinaceae	MDEBF	Evergreen	shrub	442.88	431	18.28	0.87	10.44	27.41	5.09	12	105.7	26.25	16.359	1129.5	99	2.088	170	0.52	0.1992	6.351
Chenqi village	Mahonia fortunei	Chenqi village_Mahonia fortunei	Rosaceae	MDEBF	Evergreen	shrub	462.65	456.1	13.28	0.83	9.91	5.33	1.85	1	105.7	26.25	16.359	1129.5	99	2.088	170	0.52	0.1992	6.351
Chenqi village	Myrsine africana	Chenqi village_Myrsine africana	Myrsinaceae	MDEBF	Evergreen	shrub	460.05	452.6	14.47	0.78	9.45	21.09	2.09	24	105.7	26.25	16.359	1129.5	99	2.088	170	0.52	0.1992	6.351
Chenqi village	Pittosporum trigonocarpum	Chenqi village_Pittosporum trigonocarpum	Pittosporaceae	MDEBF	Evergreen	tree	451.75	442.8	15.53	0.9	19.64	16.69	3.48	3	105.7	26.25	16.359	1129.5	99	2.088	170	0.52	0.1992	6.351
Chenqi village	Platycarya longipes	Chenqi village_Platycarya longipes	Juglandaceae	MDEBF	Deciduous	tree	456.58	447.9	15.94	1.04	6.45	28.16	4.17	5	105.7	26.25	16.359	1129.5	99	2.088	170	0.52	0.1992	6.351
Chenqi village	Prinsepia utilis	Chenqi village_Prinsepia utilis	Rosaceae	MDEBF	Evergreen	shrub	451	432.5	28.88	2.55	24.49	14.89	3.05	1	105.7	26.25	16.359	1129.5	99	2.088	170	0.52	0.1992	6.351
Chenqi village	Pyracantha fortuneana	Chenqi village_Pyracantha fortuneana	Rosaceae	MDEBF	Evergreen	shrub	488.41	482.9	16.92	1.22	8.06	14.94	2.4	5	105.7	26.25	16.359	1129.5	99	2.088	170	0.52	0.1992	6.351
Chenqi village	Quercus aliena	Chenqi village_Quercus aliena	Fagaceae	MDEBF	Deciduous	tree	460.92	450	20.56	1.02	6.93	18.19	2.08	1	105.7	26.25	16.359	1129.5	99	2.088	170	0.52	0.1992	6.351
Chenqi village	Quercus fabri	Chenqi village_Quercus fabri	Fagaceae	MDEBF	Deciduous	tree	469.13	458.6	22.05	1.09	6.24	16.3	2.02	1	105.7	26.25	16.359	1129.5	99	2.088	170	0.52	0.1992	6.351
Chenqi village	Rhamnella martinii	Chenqi village_Rhamnella martinii	Euphorbiaceae	MDEBF	Evergreen	shrub	459.65	443.1	28.82	1.27	17.13	16.61	6.38	15	105.7	26.25	16.359	1129.5	99	2.088	170	0.52	0.1992	6.351
Chenqi village	Rhamnus heterophylla	Chenqi village_Rhamnus heterophylla	Rhamnaceae	MDEBF	Evergreen	shrub	457.47	443	25.17	1.13	15.22	26.77	1.87	2	105.7	26.25	16.359	1129.5	99	2.088	170	0.52	0.1992	6.351
Chenqi village	Rhamnus leptophylla	Chenqi village_Rhamnus leptophylla	Rhamnaceae	MDEBF	Evergreen	shrub	427.75	410.5	22.17	1.05	12.62	32.46	2.35	2	105.7	26.25	16.359	1129.5	99	2.088	170	0.52	0.1992	6.351
Chenqi village	Rhus potaninii	Chenqi village_Rhus potaninii	Anacardiaceae	MDEBF	Deciduous	tree	464.1	453.1	21.49	1.14	20.87	12.71	1.36	1	105.7	26.25	16.359	1129.5	99	2.088	170	0.52	0.1992	6.351
Chenqi village	Robinia pseudoacacia	Chenqi village_Robinia pseudoacacia	Leguminosae	MDEBF	Deciduous	tree	474.23	462.8	25.33	1.21	8.91	12.28	2.43	1	105.7	26.25	16.359	1129.5	99	2.088	170	0.52	0.1992	6.351
Chenqi village	Rosa cymosa	Chenqi village_Rosa cymosa	Rosaceae	MDEBF	Evergreen	shrub	451.32	441.1	17.41	1.12	8.51	21.94	3.52	8	105.7	26.25	16.359	1129.5	99	2.088	170	0.52	0.1992	6.351
Chenqi village	Rosa henryi	Chenqi village_Rosa henryi	Rosaceae	MDEBF	Evergreen	shrub	444.34	434.8	15.24	0.95	8.67	27.03	3.06	8	105.7	26.25	16.359	1129.5	99	2.088	170	0.52	0.1992	6.351
Chenqi village	Rosa roxburghii	Chenqi village_Rosa roxburghii	Rosaceae	MDEBF	Deciduous	shrub	467.3	449	34.04	1.87	11.81	11.65	1.85	2	105.7	26.25	16.359	1129.5	99	2.088	170	0.52	0.1992	6.351
Chenqi village	Rubus inopertus	Chenqi village_Rubus inopertus	Rosaceae	MDEBF	Deciduous	shrub	445.89	431.2	22.65	1.37	8.04	17.36	6.73	10	105.7	26.25	16.359	1129.5	99	2.088	170	0.52	0.1992	6.351
Chenqi village	Rubus xanthoneurus	Chenqi village_Rubus xanthoneurus	Rosaceae	MDEBF	Deciduous	shrub	449.52	438.4	18.41	0.97	10.48	20.15	2.61	19	105.7	26.25	16.359	1129.5	99	2.088	170	0.52	0.1992	6.351
Chenqi village	Sarcococca ruscifolia	Chenqi village_Sarcococca ruscifolia	Asclepiadaceae	MDEBF	Evergreen	shrub	438.57	424	21	0.92	4.82	33.99	3.85	1	105.7	26.25	16.359	1129.5	99	2.088	170	0.52	0.1992	6.351
Chenqi village	Serissa japonica	Chenqi village_Serissa japonica	Rubiaceae	MDEBF	Evergreen	shrub	454.81	444.8	17.76	0.86	9.67	14.27	3.14	25	105.7	26.25	16.359	1129.5	99	2.088	170	0.52	0.1992	6.351
Chenqi village	Spiraea kweichowensis	Chenqi village_Spiraea kweichowensis	Rosaceae	MDEBF	Deciduous	shrub	473.5	465.9	17.6	1.18	11.45	15.78	2.39	1	105.7	26.25	16.359	1129.5	99	2.088	170	0.52	0.1992	6.351
Chenqi village	Toona sinensis	Chenqi village_Toona sinensis	Meliaceae	MDEBF	Deciduous	tree	463.82	447.8	29.4	1.43	12.98	15.77	1.97	1	105.7	26.25	16.359	1129.5	99	2.088	170	0.52	0.1992	6.351
Chenqi village	Viburnum foetidum var. ceanothoides	Chenqi village_Viburnum foetidum var. ceanothoides	Caprifoliaceae	MDEBF	Evergreen	shrub	473.12	463.4	21.72	1.52	16.03	16.58	2.35	4	105.7	26.25	16.359	1129.5	99	2.088	170	0.52	0.1992	6.351
Chenqi village	Zanthoxylum armatum	Chenqi village_Zanthoxylum armatum	Rutaceae	MDEBF	Evergreen	tree	437.07	420.3	23.4	1.35	19.27	21	2.55	1	105.7	26.25	16.359	1129.5	99	2.088	170	0.52	0.1992	6.351
Houzhai village	Celastrus orbiculatus	Houzhai village_Celastrus orbiculatus	Vitaceae	MDEBF	Deciduous	shrub	438.69	422.5	23.03	1.82	13.16	30.23	2.22	9	105.75	26.2	15.984	1115.1	160	9	101	12.35	1.301	7.246
Houzhai village	Cerasus scopulorum	Houzhai village_Cerasus scopulorum	Rosaceae	MDEBF	Deciduous	tree	449.82	435.1	23.58	1.5	22.77	18.67	4.87	2	105.75	26.2	15.984	1115.1	160	9	101	12.35	1.301	7.246
Houzhai village	Eriobotrya seguinii	Houzhai village_Eriobotrya seguinii	Rosaceae	MDEBF	Evergreen	tree	436.93	429.4	11.41	0.57	6.89	34.58	3.6	1	105.75	26.2	15.984	1115.1	160	9	101	12.35	1.301	7.246
Houzhai village	Eucommia ulmoides	Houzhai village_Eucommia ulmoides	Eucommiaceae	MDEBF	Deciduous	tree	425.76	413.9	15.67	1.16	10.03	13.45	3.41	1	105.75	26.2	15.984	1115.1	160	9	101	12.35	1.301	7.246
Houzhai village	Helwingia chinensis	Houzhai village_Helwingia chinensis	Cornaceae	MDEBF	Deciduous	shrub	428.61	415.4	17.67	1.22	30.45	22.62	7.35	16	105.75	26.2	15.984	1115.1	160	9	101	12.35	1.301	7.246
Houzhai village	Ilex corallina var. aberrans	Houzhai village_Ilex corallina var. aberrans	Aquifoliaceae	MDEBF	Evergreen	tree	495.52	490	19.64	1.08	10.57	15.61	2.33	2	105.75	26.2	15.984	1115.1	160	9	101	12.35	1.301	7.246
Houzhai village	Kalopanax septemlobus	Houzhai village_Kalopanax septemlobus	Araliaceae	MDEBF	Deciduous	tree	421.34	404.5	20.65	0.86	10.99	31.32	2.69	2	105.75	26.2	15.984	1115.1	160	9	101	12.35	1.301	7.246
Houzhai village	Leucaena leucocephala	Houzhai village_Leucaena leucocephala	Leguminosae	MDEBF	Evergreen	tree	476.13	458.3	37.2	1.17	13.2	6.5	3.52	1	105.75	26.2	15.984	1115.1	160	9	101	12.35	1.301	7.246
Houzhai village	Ligustrum lucidum	Houzhai village_Ligustrum lucidum	Oleaceae	MDEBF	Evergreen	tree	449.96	437.6	20.3	1.17	17.62	11.14	2.72	6	105.75	26.2	15.984	1115.1	160	9	101	12.35	1.301	7.246
Houzhai village	Lindera communis	Houzhai village_Lindera communis	Lauraceae	MDEBF	Evergreen	tree	500	496	16.39	1.23	10.78	4.6	1.02	6	105.75	26.2	15.984	1115.1	160	9	101	12.35	1.301	7.246
Houzhai village	Machilus cavaleriei	Houzhai village_Machilus cavaleriei	Lauraceae	MDEBF	Evergreen	tree	489.32	484.6	14.99	0.95	5.48	8.4	1.93	10	105.75	26.2	15.984	1115.1	160	9	101	12.35	1.301	7.246
Houzhai village	Platycarya longipes	Houzhai village_Platycarya longipes	Juglandaceae	MDEBF	Deciduous	tree	452.44	439.5	21.68	0.91	4.64	22.69	3.96	3	105.75	26.2	15.984	1115.1	160	9	101	12.35	1.301	7.246
Houzhai village	Pyrus calleryana	Houzhai village_Pyrus calleryana	Rosaceae	MDEBF	Deciduous	tree	465.96	458.2	16.16	0.77	8.07	14.45	3.11	1	105.75	26.2	15.984	1115.1	160	9	101	12.35	1.301	7.246
Houzhai village	Rhamnus leptophylla	Houzhai village_Rhamnus leptophylla	Rhamnaceae	MDEBF	Evergreen	shrub	417.23	394.3	26.07	0.9	16.93	34.05	2.88	5	105.75	26.2	15.984	1115.1	160	9	101	12.35	1.301	7.246
Houzhai village	Rosa cymosa	Houzhai village_Rosa cymosa	Rosaceae	MDEBF	Evergreen	shrub	446.82	437.8	14.84	0.92	7.92	18.9	3.72	5	105.75	26.2	15.984	1115.1	160	9	101	12.35	1.301	7.246
Houzhai village	Rubus lambertianus var. lambertianus	Houzhai village_Rubus lambertianus var. lambertianus	Rosaceae	MDEBF	Deciduous	shrub	453.78	441.4	21.17	1.35	23.75	15.89	4.43	23	105.75	26.2	15.984	1115.1	160	9	101	12.35	1.301	7.246
Houzhai village	Stachyurus obovatus	Houzhai village_Stachyurus obovatus	Stachyuraceae	MDEBF	Evergreen	tree	434.36	423.9	15.07	0.72	14.27	33.91	4.35	1	105.75	26.2	15.984	1115.1	160	9	101	12.35	1.301	7.246
Houzhai village	Tetradium ruticarpum	Houzhai village_Tetradium ruticarpum	Rutaceae	MDEBF	Evergreen	tree	445.76	430.2	23.76	1.16	18.01	18.44	3.11	2	105.75	26.2	15.984	1115.1	160	9	101	12.35	1.301	7.246
Houzhai village	Toona sinensis	Houzhai village_Toona sinensis	Meliaceae	MDEBF	Deciduous	tree	451.5	431.3	31.16	1.73	19.35	13.46	3.52	1	105.75	26.2	15.984	1115.1	160	9	101	12.35	1.301	7.246
Mt. Dinghu	Acronychia pedunculata	Mt. Dinghu_Acronychia pedunculata	Rutaceae	EBF	Evergreen	tree	437.26	416.2	28.36	1.44	13.89	16.64	5.18	2	112.35	23.08	21.521	1754.7	164.42	9.417	63.21	3.503	0.6781	5.553
Mt. Dinghu	Aporusa dioica	Mt. Dinghu_Aporusa dioica	Euphorbiaceae	EBF	Evergreen	tree	461.47	451.6	18.93	1.43	4.53	12.92	2.95	4	112.35	23.08	21.521	1754.7	164.42	9.417	63.21	3.503	0.6781	5.553
Mt. Dinghu	Aporusa yunnanensis	Mt. Dinghu_Aporusa yunnanensis	Euphorbiaceae	EBF	Evergreen	tree	463.89	454	19.54	1.38	10.91	19.93	2.43	5	112.35	23.08	21.521	1754.7	164.42	9.417	63.21	3.503	0.6781	5.553
Mt. Dinghu	Canarium album	Mt. Dinghu_Canarium album	Burseraceae	EBF	Evergreen	tree	480.25	473.3	18.03	0.97	17.75	7.36	2.69	2	112.35	23.08	21.521	1754.7	164.42	9.417	63.21	3.503	0.6781	5.553
Mt. Dinghu	Castanopsis chinensis	Mt. Dinghu_Castanopsis chinensis	Fagaceae	EBF	Evergreen	tree	474.39	468.5	14.16	0.38	5.45	6.94	1.57	12	112.35	23.08	21.521	1754.7	164.42	9.417	63.21	3.503	0.6781	5.553
Mt. Dinghu	Castanopsis fissa	Mt. Dinghu_Castanopsis fissa	Fagaceae	EBF	Evergreen	tree	479.42	472.9	16.79	0.73	4.87	6.65	1	2	112.35	23.08	21.521	1754.7	164.42	9.417	63.21	3.503	0.6781	5.553
Mt. Dinghu	Celtis chekiangensis	Mt. Dinghu_Celtis chekiangensis	Ulmaceae	EBF	Deciduous	tree	499.97	496.3	15.17	1.01	8.29	9.55	2.33	1	112.35	23.08	21.521	1754.7	164.42	9.417	63.21	3.503	0.6781	5.553
Mt. Dinghu	Cinnamomum camphora	Mt. Dinghu_Cinnamomum camphora	Lauraceae	EBF	Evergreen	tree	458.31	447.8	19.29	1.49	7.55	9.06	1.22	5	112.35	23.08	21.521	1754.7	164.42	9.417	63.21	3.503	0.6781	5.553
Mt. Dinghu	Cinnamomum cassia	Mt. Dinghu_Cinnamomum cassia	Lauraceae	EBF	Evergreen	tree	499.55	495.7	15.68	1.1	9.98	4.98	2.18	3	112.35	23.08	21.521	1754.7	164.42	9.417	63.21	3.503	0.6781	5.553
Mt. Dinghu	Cratoxylum cochinchinense	Mt. Dinghu_Cratoxylum cochinchinense	Clusiaceae	EBF	Evergreen	tree	500.82	496	19.77	1.25	17.99	6.16	2.34	3	112.35	23.08	21.521	1754.7	164.42	9.417	63.21	3.503	0.6781	5.553
Mt. Dinghu	Cryptocarya chinensis	Mt. Dinghu_Cryptocarya chinensis	Lauraceae	EBF	Evergreen	tree	539.33	539.8	15.81	0.87	7.37	6.8	1.62	5	112.35	23.08	21.521	1754.7	164.42	9.417	63.21	3.503	0.6781	5.553
Mt. Dinghu	Cryptocarya concinna	Mt. Dinghu_Cryptocarya concinna	Lauraceae	EBF	Evergreen	tree	500.52	495.1	21.75	1.86	10.5	5.73	3.72	1	112.35	23.08	21.521	1754.7	164.42	9.417	63.21	3.503	0.6781	5.553
Mt. Dinghu	Elaeocarpus dubius	Mt. Dinghu_Elaeocarpus dubius	Elaeocarpaceae	EBF	Evergreen	tree	432.12	419.7	17.23	2.02	20.78	21.21	7.43	1	112.35	23.08	21.521	1754.7	164.42	9.417	63.21	3.503	0.6781	5.553
Mt. Dinghu	Engelhardia roxburghiana	Mt. Dinghu_Engelhardia roxburghiana	Juglandaceae	EBF	Evergreen	tree	425.54	414.2	15.02	1.37	12.27	25.76	1.59	3	112.35	23.08	21.521	1754.7	164.42	9.417	63.21	3.503	0.6781	5.553
Mt. Dinghu	Eriobotrya japonica	Mt. Dinghu_Eriobotrya japonica	Rosaceae	EBF	Evergreen	tree	476.18	470	15.2	0.65	4.64	4.6	1.2	2	112.35	23.08	21.521	1754.7	164.42	9.417	63.21	3.503	0.6781	5.553
Mt. Dinghu	Euodia lepta	Mt. Dinghu_Euodia lepta	Rutaceae	EBF	Evergreen	tree	482.86	471.6	28.41	1.15	8.94	6.43	2.39	1	112.35	23.08	21.521	1754.7	164.42	9.417	63.21	3.503	0.6781	5.553
Mt. Dinghu	Ficus variolosa	Mt. Dinghu_Ficus variolosa	Moraceae	EBF	Evergreen	tree	455.01	444.5	18.58	1.09	6.87	12.74	2.09	4	112.35	23.08	21.521	1754.7	164.42	9.417	63.21	3.503	0.6781	5.553
Mt. Dinghu	Garcinia oblongifolia	Mt. Dinghu_Garcinia oblongifolia	Clusiaceae	EBF	Evergreen	tree	462.17	454.6	15.07	1.16	7.44	8.26	1.13	2	112.35	23.08	21.521	1754.7	164.42	9.417	63.21	3.503	0.6781	5.553
Mt. Dinghu	Gironniera subaequalis	Mt. Dinghu_Gironniera subaequalis	Ulmaceae	EBF	Evergreen	tree	442.3	422	28.74	0.65	4.19	7.24	1.7	3	112.35	23.08	21.521	1754.7	164.42	9.417	63.21	3.503	0.6781	5.553
Mt. Dinghu	Helicia formosana	Mt. Dinghu_Helicia formosana	Proteaceae	EBF	Evergreen	tree	490.61	486.8	12.64	0.65	10.17	11.27	3.06	6	112.35	23.08	21.521	1754.7	164.42	9.417	63.21	3.503	0.6781	5.553
Mt. Dinghu	Itea chinensis	Mt. Dinghu_Itea chinensis	Saxifragaceae	EBF	Evergreen	tree	466.96	453.7	26.09	1.96	25.28	12.58	2.73	1	112.35	23.08	21.521	1754.7	164.42	9.417	63.21	3.503	0.6781	5.553
Mt. Dinghu	Litsea cubeba	Mt. Dinghu_Litsea cubeba	Lauraceae	EBF	Evergreen	tree	465.74	448.8	31.45	1.37	10.44	20.28	3.7	2	112.35	23.08	21.521	1754.7	164.42	9.417	63.21	3.503	0.6781	5.553
Mt. Dinghu	Litsea verticillata	Mt. Dinghu_Litsea verticillata	Lauraceae	EBF	Evergreen	tree	444.88	436.8	13.17	0.87	8.33	13.02	2.3	3	112.35	23.08	21.521	1754.7	164.42	9.417	63.21	3.503	0.6781	5.553
Mt. Dinghu	Macaranga sampsonii	Mt. Dinghu_Macaranga sampsonii	Euphorbiaceae	EBF	Evergreen	tree	489.24	483.5	17.82	0.92	6.51	4.73	1.21	3	112.35	23.08	21.521	1754.7	164.42	9.417	63.21	3.503	0.6781	5.553
Mt. Dinghu	Machilus kwangtungensis	Mt. Dinghu_Machilus kwangtungensis	Lauraceae	EBF	Evergreen	tree	466.58	457.7	18.37	1.07	7.81	14.46	1.75	8	112.35	23.08	21.521	1754.7	164.42	9.417	63.21	3.503	0.6781	5.553
Mt. Dinghu	Machilus robusta	Mt. Dinghu_Machilus robusta	Lauraceae	EBF	Evergreen	tree	478.85	472.9	15.34	1.02	6.43	11.67	2	2	112.35	23.08	21.521	1754.7	164.42	9.417	63.21	3.503	0.6781	5.553
Mt. Dinghu	Machilus velutina	Mt. Dinghu_Machilus velutina	Lauraceae	EBF	Evergreen	tree	490.86	487.6	11.01	0.5	10.29	6.06	2	3	112.35	23.08	21.521	1754.7	164.42	9.417	63.21	3.503	0.6781	5.553
Mt. Dinghu	Pithecellobium lucidum	Mt. Dinghu_Pithecellobium lucidum	Fabaceae	EBF	Evergreen	tree	457.14	435.2	35.17	0.6	4.98	20.9	0.86	2	112.35	23.08	21.521	1754.7	164.42	9.417	63.21	3.503	0.6781	5.553
Mt. Dinghu	Psychotria asiatica	Mt. Dinghu_Psychotria asiatica	Rubiaceae	EBF	Evergreen	tree	459.91	449	20.3	3.47	27.85	19.19	6.36	1	112.35	23.08	21.521	1754.7	164.42	9.417	63.21	3.503	0.6781	5.553
Mt. Dinghu	Rhaphiolepis indica	Mt. Dinghu_Rhaphiolepis indica	Rosaceae	EBF	Evergreen	tree	427.14	417.5	13.12	0.47	2.34	15.02	1.24	1	112.35	23.08	21.521	1754.7	164.42	9.417	63.21	3.503	0.6781	5.553
Mt. Dinghu	Schefflera minutistellata	Mt. Dinghu_Schefflera minutistellata	Araliaceae	EBF	Evergreen	tree	524.83	524	12.1	0.51	7.23	3.14	2.3	1	112.35	23.08	21.521	1754.7	164.42	9.417	63.21	3.503	0.6781	5.553
Mt. Dinghu	Sterculia lanceolata	Mt. Dinghu_Sterculia lanceolata	Sterculiaceae	EBF	Evergreen	tree	478.66	469	23.42	0.9	8.11	13.15	3.69	2	112.35	23.08	21.521	1754.7	164.42	9.417	63.21	3.503	0.6781	5.553
Mt. Dinghu	Syzygium hancei	Mt. Dinghu_Syzygium hancei	Myrtaceae	EBF	Evergreen	tree	450.34	443.9	11.31	0.6	6.69	5.64	2.31	1	112.35	23.08	21.521	1754.7	164.42	9.417	63.21	3.503	0.6781	5.553
Mt. Dinghu	Syzygium levinei	Mt. Dinghu_Syzygium levinei	Myrtaceae	EBF	Evergreen	tree	515.56	513.5	15.32	0.75	4.69	5.23	0.68	1	112.35	23.08	21.521	1754.7	164.42	9.417	63.21	3.503	0.6781	5.553
Mt. Dinghu	Zanthoxylum avicennae	Mt. Dinghu_Zanthoxylum avicennae	Rutaceae	EBF	Evergreen	tree	485.34	468.4	40.69	1.2	12.81	13.99	1.85	2	112.35	23.08	21.521	1754.7	164.42	9.417	63.21	3.503	0.6781	5.553
Mt. Guandishan	Acer grosseri	Mt. Guandishan_Acer grosseri	Aceracead	DBF	Deciduous	tree	477.36	466.3	25.77	1.27	7.86	9.37	1.99	3	111.45	37.85	7.4104	442.3	171.96	6	165.77	10.8	2.472	6.282
Mt. Guandishan	Acer mono	Mt. Guandishan_Acer mono	Aceraceae	DBF	Deciduous	tree	460.84	447.2	24.85	1.03	9.07	13.95	4.21	2	111.45	37.85	7.4104	442.3	171.96	6	165.77	10.8	2.472	6.282
Mt. Guandishan	Betula albosinensis	Mt. Guandishan_Betula albosinensis	Betulaceae	DBF	Deciduous	tree	471.71	453.4	35.9	2.72	14.76	9.29	2.7	4	111.45	37.85	7.4104	442.3	171.96	6	165.77	10.8	2.472	6.282
Mt. Guandishan	Betula dahurica	Mt. Guandishan_Betula dahurica	Betulaceae	DBF	Deciduous	tree	487.93	477.5	29.03	1.68	9.76	7.27	3.1	2	111.45	37.85	7.4104	442.3	171.96	6	165.77	10.8	2.472	6.282
Mt. Guandishan	Carpinus cordata	Mt. Guandishan_Carpinus cordata	Betulaceae	DBF	Deciduous	tree	420.39	396.5	27.6	1.66	15.86	22.18	3.4	2	111.45	37.85	7.4104	442.3	171.96	6	165.77	10.8	2.472	6.282
Mt. Guandishan	Corylus mandshurica	Mt. Guandishan_Corylus mandshurica	Betulaceae	DBF	Deciduous	shrub	442.93	423.9	27.4	1.49	7.41	22.04	3.83	1	111.45	37.85	7.4104	442.3	171.96	6	165.77	10.8	2.472	6.282
Mt. Guandishan	Cotoneaster multiflorus	Mt. Guandishan_Cotoneaster multiflorus	Rosaceae	DBF	Deciduous	shrub	462.84	450.4	23.53	1.73	17.21	14.26	3.3	2	111.45	37.85	7.4104	442.3	171.96	6	165.77	10.8	2.472	6.282
Mt. Guandishan	Crataegus kansuensis	Mt. Guandishan_Crataegus kansuensis	Rosaceae	DBF	Deciduous	tree	436.66	421.8	21	1.58	17.7	17.93	3.77	1	111.45	37.85	7.4104	442.3	171.96	6	165.77	10.8	2.472	6.282
Mt. Guandishan	Populus davidiana	Mt. Guandishan_Populus davidiana	Salicaceae	DBF	Deciduous	tree	488.33	479	26.67	1.45	12.36	14.54	2.43	1	111.45	37.85	7.4104	442.3	171.96	6	165.77	10.8	2.472	6.282
Mt. Guandishan	Populus nigra	Mt. Guandishan_Populus nigra	Salicaceae	DBF	Deciduous	tree	448.18	434.7	21.5	3.23	21.26	16.03	4.09	1	111.45	37.85	7.4104	442.3	171.96	6	165.77	10.8	2.472	6.282
Mt. Guandishan	Quercus wutaishanica	Mt. Guandishan_Quercus wutaishanica	Fagaceae	DBF	Deciduous	tree	467.64	454.1	26.78	1.41	8.14	10.14	2.62	6	111.45	37.85	7.4104	442.3	171.96	6	165.77	10.8	2.472	6.282
Mt. Guandishan	Spiraea pubescens	Mt. Guandishan_Spiraea pubescens	Rosaceae	DBF	Deciduous	shrub	468.08	456	24.46	1.28	14.98	12.02	3.01	1	111.45	37.85	7.4104	442.3	171.96	6	165.77	10.8	2.472	6.282
Mt. Guandishan	Syringa oblata	Mt. Guandishan_Syringa oblata	Oleaceae	DBF	Deciduous	tree	477.63	465.3	28.3	1.35	14.01	6.82	1.69	2	111.45	37.85	7.4104	442.3	171.96	6	165.77	10.8	2.472	6.282
Mt. Guanshan	Acer truncatum	Mt. Guanshan_Acer truncatum	Aceraceae	DBF	Deciduous	tree	447.44	435.5	19.2	1.56	9.78	22.59	4.19	2	106.65	34.75	8.8538	545.81	396.3	16.15	171.75	11.04	3.643	6.186
Mt. Guanshan	Betula platyphylla	Mt. Guanshan_Betula platyphylla	Betulaceae	DBF	Deciduous	tree	500.45	494	25.17	1.43	10.09	7.48	2.55	5	106.65	34.75	8.8538	545.81	396.3	16.15	171.75	11.04	3.643	6.186
Mt. Guanshan	Carpinus cordata	Mt. Guanshan_Carpinus cordata	Betulaceae	DBF	Deciduous	tree	474.97	463	26.6	1.17	9.26	13.02	1.78	2	106.65	34.75	8.8538	545.81	396.3	16.15	171.75	11.04	3.643	6.186
Mt. Guanshan	Carpinus turczaninowii	Mt. Guanshan_Carpinus turczaninowii	Betulaceae	DBF	Deciduous	tree	450.44	436.3	22.93	1.11	5.99	16.81	2.27	3	106.65	34.75	8.8538	545.81	396.3	16.15	171.75	11.04	3.643	6.186
Mt. Guanshan	Corylus heterophylla var. sutchuanensis	Mt. Guanshan_Corylus heterophylla var. sutchuanensis	Betulaceae	DBF	Deciduous	shrub	447.77	435.8	19.3	2.1	17.8	19.73	4.61	1	106.65	34.75	8.8538	545.81	396.3	16.15	171.75	11.04	3.643	6.186
Mt. Guanshan	Corylus mandshurica	Mt. Guanshan_Corylus mandshurica	Betulaceae	DBF	Deciduous	shrub	439.18	426.5	18.7	0.93	6.56	16.36	3.59	1	106.65	34.75	8.8538	545.81	396.3	16.15	171.75	11.04	3.643	6.186
Mt. Guanshan	Cotoneaster acutifolius	Mt. Guanshan_Cotoneaster acutifolius	Rosaceae	DBF	Deciduous	shrub	457.68	446.7	19.9	1	9.91	15.88	2.81	5	106.65	34.75	8.8538	545.81	396.3	16.15	171.75	11.04	3.643	6.186
Mt. Guanshan	Crataegus kansuensis	Mt. Guanshan_Crataegus kansuensis	Rosaceae	DBF	Deciduous	tree	441.57	433.1	13.3	2.63	13.09	18.19	4.79	2	106.65	34.75	8.8538	545.81	396.3	16.15	171.75	11.04	3.643	6.186
Mt. Guanshan	Quercus aliena	Mt. Guanshan_Quercus aliena	Fagaceae	DBF	Deciduous	tree	471.65	459.3	26.1	1.75	8.41	9.86	1.63	1	106.65	34.75	8.8538	545.81	396.3	16.15	171.75	11.04	3.643	6.186
Mt. Guanshan	Quercus wutaishanica	Mt. Guanshan_Quercus wutaishanica	Fagaceae	DBF	Deciduous	tree	467.34	455.1	24.51	1.22	5.73	9.35	2.28	3	106.65	34.75	8.8538	545.81	396.3	16.15	171.75	11.04	3.643	6.186
Mt. Guanshan	Spiraea pubescens	Mt. Guanshan_Spiraea pubescens	Rosaceae	DBF	Deciduous	shrub	464.19	445.3	33.7	1.59	13.36	9.33	2.92	3	106.65	34.75	8.8538	545.81	396.3	16.15	171.75	11.04	3.643	6.186
Mt. Guanshan	Tilia mongolica	Mt. Guanshan_Tilia mongolica	Tiliaceae	DBF	Deciduous	tree	435.27	417.5	24.2	2.27	13.05	23.07	4.92	1	106.65	34.75	8.8538	545.81	396.3	16.15	171.75	11.04	3.643	6.186
Mt. Huanglongshan	Acer davidii	Mt. Huanglongshan_Acer davidii	Aceraceae	DBF	Deciduous	tree	445.18	421.3	33.6	1.38	13.33	20.05	3.6	1	110.11	35.75	12.318	533.26	32.32	4	147	3.376	0.8732	8.202
Mt. Huanglongshan	Acer ginnala	Mt. Huanglongshan_Acer ginnala	Aceraceae	DBF	Deciduous	tree	482.05	471.3	27	1.23	8.08	11.03	2.34	2	110.11	35.75	12.318	533.26	32.32	4	147	3.376	0.8732	8.202
Mt. Huanglongshan	Betula platyphylla	Mt. Huanglongshan_Betula platyphylla	Betulaceae	DBF	Deciduous	tree	502.04	496.2	24.1	1.24	8.86	9.57	3.07	8	110.11	35.75	12.318	533.26	32.32	4	147	3.376	0.8732	8.202
Mt. Huanglongshan	Carpinus turczaninowii	Mt. Huanglongshan_Carpinus turczaninowii	Betulaceae	DBF	Deciduous	tree	468.59	457.5	22.9	1.02	5.68	13.71	1.92	2	110.11	35.75	12.318	533.26	32.32	4	147	3.376	0.8732	8.202
Mt. Huanglongshan	Corylus heterophylla	Mt. Huanglongshan_Corylus heterophylla	Betulaceae	DBF	Deciduous	shrub	465.91	454.9	22	1.1	7.15	16.33	3.46	6	110.11	35.75	12.318	533.26	32.32	4	147	3.376	0.8732	8.202
Mt. Huanglongshan	Cotoneaster multiflorus	Mt. Huanglongshan_Cotoneaster multiflorus	Rosaceae	DBF	Deciduous	shrub	459.54	449.8	18.3	1.1	12.92	20.53	2.61	1	110.11	35.75	12.318	533.26	32.32	4	147	3.376	0.8732	8.202
Mt. Huanglongshan	Crataegus kansuensis	Mt. Huanglongshan_Crataegus kansuensis	Rosaceae	DBF	Deciduous	tree	451.13	440.1	18.6	1.04	14.22	21.49	3.54	1	110.11	35.75	12.318	533.26	32.32	4	147	3.376	0.8732	8.202
Mt. Huanglongshan	Euonymus verrucosoides	Mt. Huanglongshan_Euonymus verrucosoides	Celastraceae	DBF	Deciduous	shrub	447.22	435.6	18.7	1.09	13.36	22.58	2.8	3	110.11	35.75	12.318	533.26	32.32	4	147	3.376	0.8732	8.202
Mt. Huanglongshan	Populus davidiana	Mt. Huanglongshan_Populus davidiana	Salicaceae	DBF	Deciduous	tree	477.96	469.8	20.03	1.13	12.45	24.57	2.77	2	110.11	35.75	12.318	533.26	32.32	4	147	3.376	0.8732	8.202
Mt. Huanglongshan	Quercus wutaishanica	Mt. Huanglongshan_Quercus wutaishanica	Fagaceae	DBF	Deciduous	tree	466.92	454	25.52	1.34	6.89	12.75	2.57	1	110.11	35.75	12.318	533.26	32.32	4	147	3.376	0.8732	8.202
Mt. Huanglongshan	Spiraea pubescens	Mt. Huanglongshan_Spiraea pubescens	Rosaceae	DBF	Deciduous	shrub	466.3	454.8	22.95	1.41	13.1	16.67	3.59	3	110.11	35.75	12.318	533.26	32.32	4	147	3.376	0.8732	8.202
Mt. Huanglongshan	Syringa pekinensis	Mt. Huanglongshan_Syringa pekinensis	Oleaceae	DBF	Deciduous	tree	482.29	470	30.25	1.4	15.42	10.39	2.54	2	110.11	35.75	12.318	533.26	32.32	4	147	3.376	0.8732	8.202
Mt. Huanglongshan	Tilia dictyoneura	Mt. Huanglongshan_Tilia dictyoneura	Tiliaceae	DBF	Deciduous	tree	424.03	405.5	22.9	1.65	18.1	19.79	1.93	1	110.11	35.75	12.318	533.26	32.32	4	147	3.376	0.8732	8.202
Mt. Jianfeng	Acer fabri	Mt. Jianfeng_Acer fabri	Aceraceae	EBF	Evergreen	tree	494.33	488.4	20.36	0.75	15.48	8.33	2.11	4	109.1	18.85	25.182	2127.4	128.55	4.746	114.37	0.5	0.2245	4.881
Mt. Jianfeng	Alniphyllum fortunei	Mt. Jianfeng_Alniphyllum fortunei	Styracaceae	EBF	Evergreen	tree	471.81	465.9	13.68	1	8.99	8.71	1.34	4	109.1	18.85	25.182	2127.4	128.55	4.746	114.37	0.5	0.2245	4.881
Mt. Jianfeng	Alstonia scholaris	Mt. Jianfeng_Alstonia scholaris	Apocynaceae	EBF	Evergreen	tree	504.55	501.1	16.26	1.22	9.32	7.84	2.68	3	109.1	18.85	25.182	2127.4	128.55	4.746	114.37	0.5	0.2245	4.881
Mt. Jianfeng	Antidesma maclurei	Mt. Jianfeng_Antidesma maclurei	Euphorbiaceae	EBF	Evergreen	tree	456.86	450.2	12.56	1.73	9.9	7.34	2.29	6	109.1	18.85	25.182	2127.4	128.55	4.746	114.37	0.5	0.2245	4.881
Mt. Jianfeng	Cinnamomum porrectum	Mt. Jianfeng_Cinnamomum porrectum	Lauraceae	EBF	Evergreen	tree	465.35	460.9	9.6	1.01	5.43	7.51	1.54	3	109.1	18.85	25.182	2127.4	128.55	4.746	114.37	0.5	0.2245	4.881
Mt. Jianfeng	Cyclobalanopsis patelliformis	Mt. Jianfeng_Cyclobalanopsis patelliformis	Fagaceae	EBF	Evergreen	tree	484.07	480.2	11.3	0.7	14.09	14.21	3.76	8	109.1	18.85	25.182	2127.4	128.55	4.746	114.37	0.5	0.2245	4.881
Mt. Jianfeng	Decaspermum gracilentum	Mt. Jianfeng_Decaspermum gracilentum	Myrtaceae	EBF	Evergreen	tree	471.52	469.3	5.4	0.57	6.15	5.87	1.68	2	109.1	18.85	25.182	2127.4	128.55	4.746	114.37	0.5	0.2245	4.881
Mt. Jianfeng	Endospermum chinense	Mt. Jianfeng_Endospermum chinense	Euphorbiaceae	EBF	Evergreen	tree	475.5	466.2	21.63	1.59	11.49	3.89	2.81	1	109.1	18.85	25.182	2127.4	128.55	4.746	114.37	0.5	0.2245	4.881
Mt. Jianfeng	Gordonia axillaris	Mt. Jianfeng_Gordonia axillaris	Theaceae	EBF	Evergreen	tree	501.9	499.8	9.53	0.55	5.23	19.46	1.94	1	109.1	18.85	25.182	2127.4	128.55	4.746	114.37	0.5	0.2245	4.881
Mt. Jianfeng	Litsea baviensis	Mt. Jianfeng_Litsea baviensis	Lauraceae	EBF	Evergreen	tree	482.64	473.4	24	1.04	6.87	8.02	1.79	2	109.1	18.85	25.182	2127.4	128.55	4.746	114.37	0.5	0.2245	4.881
Mt. Jianfeng	Microcos paniculata	Mt. Jianfeng_Microcos paniculata	Tiliaceae	EBF	Evergreen	tree	514.88	511.8	21.26	0.72	7.7	5.67	1.52	1	109.1	18.85	25.182	2127.4	128.55	4.746	114.37	0.5	0.2245	4.881
Mt. Jianfeng	Osmanthus didymopetalus	Mt. Jianfeng_Osmanthus didymopetalus	Oleaceae	EBF	Evergreen	tree	524.15	520.7	38.56	0.55	5.39	4.36	1.38	3	109.1	18.85	25.182	2127.4	128.55	4.746	114.37	0.5	0.2245	4.881
Mt. Jianfeng	Pentaphylax euryoides	Mt. Jianfeng_Pentaphylax euryoides	Pentaphylacaceae	EBF	Evergreen	tree	488.24	483.7	14.16	0.77	11.04	15.53	2.67	1	109.1	18.85	25.182	2127.4	128.55	4.746	114.37	0.5	0.2245	4.881
Mt. Jianfeng	Pertusadina hainanensis	Mt. Jianfeng_Pertusadina hainanensis	Rubiaceae	EBF	Evergreen	tree	459.85	447.7	22.26	0.8	6.34	7.6	4.87	4	109.1	18.85	25.182	2127.4	128.55	4.746	114.37	0.5	0.2245	4.881
Mt. Jianfeng	Pertusadina metcalfii	Mt. Jianfeng_Pertusadina metcalfii	Rubiaceae	EBF	Evergreen	tree	518.46	515.5	24.3	1.39	14.51	12.32	2.46	1	109.1	18.85	25.182	2127.4	128.55	4.746	114.37	0.5	0.2245	4.881
Mt. Jianfeng	Polyspora axillaris	Mt. Jianfeng_Polyspora axillaris	Theaceae	EBF	Evergreen	tree	505.93	504.6	7.01	1.21	7.95	11.58	1.09	2	109.1	18.85	25.182	2127.4	128.55	4.746	114.37	0.5	0.2245	4.881
Mt. Jianfeng	Santalum album	Mt. Jianfeng_Santalum album	Ericaceae	EBF	Evergreen	tree	512.39	511.6	5.4	0.36	8.62	5.43	1.98	9	109.1	18.85	25.182	2127.4	128.55	4.746	114.37	0.5	0.2245	4.881
Mt. Jianfeng	Saprosma ternata	Mt. Jianfeng_Saprosma ternata	Rubiaceae	EBF	Evergreen	shrub	472.15	464.6	17.15	1.02	6.16	16.61	1.67	3	109.1	18.85	25.182	2127.4	128.55	4.746	114.37	0.5	0.2245	4.881
Mt. Jianfeng	Wendlandia uvariifolia	Mt. Jianfeng_Wendlandia uvariifolia	Rubiaceae	EBF	Evergreen	tree	535.7	535.8	20.34	0.98	11.21	5.43	1	3	109.1	18.85	25.182	2127.4	128.55	4.746	114.37	0.5	0.2245	4.881
Mt. Luyashan	Betula albosinensis	Mt. Luyashan_Betula albosinensis	Betulaceae	DBF	Deciduous	tree	469.61	453.2	32.1	1.78	10.67	8.48	2.53	6	111.75	38.71	5.5033	437.98	290.64	4.61	134.08	5.228	1.426	6.681
Mt. Luyashan	Betula utilis	Mt. Luyashan_Betula utilis	Betulaceae	DBF	Deciduous	tree	501.78	493	33.46	1.65	8.85	8.56	3.08	4	111.75	38.71	5.5033	437.98	290.64	4.61	134.08	5.228	1.426	6.681
Mt. Luyashan	Corylus mandshurica	Mt. Luyashan_Corylus mandshurica	Betulaceae	DBF	Deciduous	shrub	441.07	421.1	28.05	1.52	8.69	20.24	3.37	4	111.75	38.71	5.5033	437.98	290.64	4.61	134.08	5.228	1.426	6.681
Mt. Luyashan	Cotoneaster acutifolius	Mt. Luyashan_Cotoneaster acutifolius	Rosaceae	DBF	Deciduous	shrub	458.28	442.5	27.3	1.49	15.32	8.78	2.09	8	111.75	38.71	5.5033	437.98	290.64	4.61	134.08	5.228	1.426	6.681
Mt. Luyashan	Cotoneaster multiflorus	Mt. Luyashan_Cotoneaster multiflorus	Rosaceae	DBF	Deciduous	shrub	434.43	417.3	23.28	1.47	18.21	17.27	2.85	6	111.75	38.71	5.5033	437.98	290.64	4.61	134.08	5.228	1.426	6.681
Mt. Luyashan	Crataegus kansuensis	Mt. Luyashan_Crataegus kansuensis	Rosaceae	DBF	Deciduous	tree	452.69	435.3	27.9	1.39	15.42	21.66	3.49	3	111.75	38.71	5.5033	437.98	290.64	4.61	134.08	5.228	1.426	6.681
Mt. Luyashan	Ostryopsis davidiana	Mt. Luyashan_Ostryopsis davidiana	Betulaceae	DBF	Deciduous	shrub	447.63	434.5	20.9	1.17	6.4	15.42	2.6	1	111.75	38.71	5.5033	437.98	290.64	4.61	134.08	5.228	1.426	6.681
Mt. Luyashan	Populus cathayana	Mt. Luyashan_Populus cathayana	Salicaceae	DBF	Deciduous	tree	442.08	425.2	24.6	1.3	11.69	25.29	2.53	2	111.75	38.71	5.5033	437.98	290.64	4.61	134.08	5.228	1.426	6.681
Mt. Luyashan	Populus davidiana	Mt. Luyashan_Populus davidiana	Salicaceae	DBF	Deciduous	tree	458.23	445.5	22.75	1.21	11.41	23.99	2.81	2	111.75	38.71	5.5033	437.98	290.64	4.61	134.08	5.228	1.426	6.681
Mt. Luyashan	Spiraea pubescens	Mt. Luyashan_Spiraea pubescens	Rosaceae	DBF	Deciduous	shrub	459.18	446	23.7	1.25	13.83	11.95	2.85	6	111.75	38.71	5.5033	437.98	290.64	4.61	134.08	5.228	1.426	6.681
Mt. Taibaishan	Acer davidii	Mt. Taibaishan_Acer davidii	Aceraceae	DBF	Deciduous	tree	450.2	437.9	20.27	1.04	10.38	17.98	5.29	2	107.55	33.91	10.526	644.46	332.92	6	149.2	9.083	1.691	5.995
Mt. Taibaishan	Acer ginnala	Mt. Taibaishan_Acer ginnala	Aceraceae	DBF	Deciduous	tree	468.46	458.9	20.1	1.1	8.1	15.48	3.8	2	107.55	33.91	10.526	644.46	332.92	6	149.2	9.083	1.691	5.995
Mt. Taibaishan	Acer griseum	Mt. Taibaishan_Acer griseum	Aceraceae	DBF	Deciduous	tree	487	476.1	29.6	1.42	8.54	11.19	1.38	1	107.55	33.91	10.526	644.46	332.92	6	149.2	9.083	1.691	5.995
Mt. Taibaishan	Acer grosseri	Mt. Taibaishan_Acer grosseri	Aceracead	DBF	Deciduous	tree	463.12	450.7	23.57	1.28	12.94	15.82	2.46	1	107.55	33.91	10.526	644.46	332.92	6	149.2	9.083	1.691	5.995
Mt. Taibaishan	Acer mono	Mt. Taibaishan_Acer mono	Aceraceae	DBF	Deciduous	tree	464.9	452.2	24.54	1.03	11.79	15.68	2.59	2	107.55	33.91	10.526	644.46	332.92	6	149.2	9.083	1.691	5.995
Mt. Taibaishan	Acer oliverianum	Mt. Taibaishan_Acer oliverianum	Aceraceae	DBF	Deciduous	tree	471.56	459.1	26.27	1.31	11.87	14.93	2.48	1	107.55	33.91	10.526	644.46	332.92	6	149.2	9.083	1.691	5.995
Mt. Taibaishan	Acer robustum	Mt. Taibaishan_Acer robustum	Aceracead	DBF	Deciduous	tree	433.91	414.3	26	1.21	13.56	23.69	3.93	1	107.55	33.91	10.526	644.46	332.92	6	149.2	9.083	1.691	5.995
Mt. Taibaishan	Acer truncatum	Mt. Taibaishan_Acer truncatum	Aceraceae	DBF	Deciduous	tree	459.76	447.7	22.1	0.96	12.3	16.99	3.3	1	107.55	33.91	10.526	644.46	332.92	6	149.2	9.083	1.691	5.995
Mt. Taibaishan	Acer tsinglingense	Mt. Taibaishan_Acer tsinglingense	Aceraceae	DBF	Deciduous	tree	465.5	454.6	21.7	3.45	21.41	12.47	3.35	1	107.55	33.91	10.526	644.46	332.92	6	149.2	9.083	1.691	5.995
Mt. Taibaishan	Berberis ferdinandi-coburgii	Mt. Taibaishan_Berberis ferdinandi-coburgii	Berberidaceae	DBF	Deciduous	tree	458.89	443.6	26.77	0.97	16.96	17.8	2.6	4	107.55	33.91	10.526	644.46	332.92	6	149.2	9.083	1.691	5.995
Mt. Taibaishan	Betula albosinensis	Mt. Taibaishan_Betula albosinensis	Betulaceae	DBF	Deciduous	tree	479.83	468.8	26.66	1.41	12.62	10.02	2.47	1	107.55	33.91	10.526	644.46	332.92	6	149.2	9.083	1.691	5.995
Mt. Taibaishan	Betula platyphylla	Mt. Taibaishan_Betula platyphylla	Betulaceae	DBF	Deciduous	tree	492.93	484.7	26.19	1.02	9.84	8.9	2.92	1	107.55	33.91	10.526	644.46	332.92	6	149.2	9.083	1.691	5.995
Mt. Taibaishan	Betula utilis	Mt. Taibaishan_Betula utilis	Betulaceae	DBF	Deciduous	tree	482.41	470.7	29.13	1.63	10.76	7.01	1.83	1	107.55	33.91	10.526	644.46	332.92	6	149.2	9.083	1.691	5.995
Mt. Taibaishan	Carpinus cordata	Mt. Taibaishan_Carpinus cordata	Betulaceae	DBF	Deciduous	tree	458.84	445.3	24.15	0.92	7.65	13.92	2.01	1	107.55	33.91	10.526	644.46	332.92	6	149.2	9.083	1.691	5.995
Mt. Taibaishan	Carpinus fargesiana	Mt. Taibaishan_Carpinus fargesiana	Betulaceae	DBF	Deciduous	tree	480.69	470	26.31	1.12	7.16	18.46	3.17	2	107.55	33.91	10.526	644.46	332.92	6	149.2	9.083	1.691	5.995
Mt. Taibaishan	Carpinus turczaninowii	Mt. Taibaishan_Carpinus turczaninowii	Betulaceae	DBF	Deciduous	tree	456.94	445.3	20.77	0.87	7.77	17.63	2.45	1	107.55	33.91	10.526	644.46	332.92	6	149.2	9.083	1.691	5.995
Mt. Taibaishan	Corylus chinensis	Mt. Taibaishan_Corylus chinensis	Betulaceae	DBF	Deciduous	tree	473.41	463.8	21.6	0.84	6.63	15	3.98	1	107.55	33.91	10.526	644.46	332.92	6	149.2	9.083	1.691	5.995
Mt. Taibaishan	Corylus ferox	Mt. Taibaishan_Corylus ferox	Betulaceae	DBF	Deciduous	tree	464.98	453.4	22.7	1.07	10.26	12.26	2.6	1	107.55	33.91	10.526	644.46	332.92	6	149.2	9.083	1.691	5.995
Mt. Taibaishan	Corylus heterophylla var. sutchuanensis	Mt. Taibaishan_Corylus heterophylla var. sutchuanensis	Betulaceae	DBF	Deciduous	shrub	466.58	455.2	22.82	1.05	12.22	16.22	4.18	2	107.55	33.91	10.526	644.46	332.92	6	149.2	9.083	1.691	5.995
Mt. Taibaishan	Corylus mandshurica	Mt. Taibaishan_Corylus mandshurica	Betulaceae	DBF	Deciduous	shrub	454.42	441.7	21.82	0.9	7.57	19.44	3.75	1	107.55	33.91	10.526	644.46	332.92	6	149.2	9.083	1.691	5.995
Mt. Taibaishan	Cotoneaster acutifolius	Mt. Taibaishan_Cotoneaster acutifolius	Rosaceae	DBF	Deciduous	shrub	450.19	438.1	19.97	0.93	18.11	16.51	4.56	1	107.55	33.91	10.526	644.46	332.92	6	149.2	9.083	1.691	5.995
Mt. Taibaishan	Cotoneaster zabelii	Mt. Taibaishan_Cotoneaster zabelii	Rosaceae	DBF	Deciduous	shrub	467.08	459	17	0.82	11.8	18.78	4.48	1	107.55	33.91	10.526	644.46	332.92	6	149.2	9.083	1.691	5.995
Mt. Taibaishan	Crataegus hupehensis	Mt. Taibaishan_Crataegus hupehensis	Rosaceae	DBF	Deciduous	tree	459.89	451.4	16.25	0.7	12.48	18	3.33	1	107.55	33.91	10.526	644.46	332.92	6	149.2	9.083	1.691	5.995
Mt. Taibaishan	Crataegus kansuensis	Mt. Taibaishan_Crataegus kansuensis	Rosaceae	DBF	Deciduous	tree	459.57	451.4	15.64	0.79	11.5	18.84	3.69	1	107.55	33.91	10.526	644.46	332.92	6	149.2	9.083	1.691	5.995
Mt. Taibaishan	Crataegus shensiensis	Mt. Taibaishan_Crataegus shensiensis	Rosaceae	DBF	Deciduous	tree	463.26	454	18.3	0.81	9.09	19.03	3.39	1	107.55	33.91	10.526	644.46	332.92	6	149.2	9.083	1.691	5.995
Mt. Taibaishan	Euonymus alatus	Mt. Taibaishan_Euonymus alatus	Celastraceae	DBF	Deciduous	shrub	463.25	453.9	18.45	1.05	9.07	19.79	3.11	2	107.55	33.91	10.526	644.46	332.92	6	149.2	9.083	1.691	5.995
Mt. Taibaishan	Euonymus verrucosoides	Mt. Taibaishan_Euonymus verrucosoides	Celastraceae	DBF	Deciduous	shrub	460.77	449.8	20.6	1.1	11.13	17.52	4.06	1	107.55	33.91	10.526	644.46	332.92	6	149.2	9.083	1.691	5.995
Mt. Taibaishan	Populus davidiana	Mt. Taibaishan_Populus davidiana	Salicaceae	DBF	Deciduous	tree	489.72	483.6	19.05	0.99	6.41	11.83	2.1	2	107.55	33.91	10.526	644.46	332.92	6	149.2	9.083	1.691	5.995
Mt. Taibaishan	Populus davidiana var. davidiana f. laticuneata	Mt. Taibaishan_Populus davidiana var. davidiana f. laticuneata	Salicaceae	DBF	Deciduous	tree	461.56	448.7	23.85	1.01	10.16	19.47	3.49	1	107.55	33.91	10.526	644.46	332.92	6	149.2	9.083	1.691	5.995
Mt. Taibaishan	Populus purdomii	Mt. Taibaishan_Populus purdomii	Salicaceae	DBF	Deciduous	tree	444.98	429.3	23.73	1.72	17.78	18.39	2.34	3	107.55	33.91	10.526	644.46	332.92	6	149.2	9.083	1.691	5.995
Mt. Taibaishan	Quercus aliena	Mt. Taibaishan_Quercus aliena	Fagaceae	DBF	Deciduous	tree	475.7	465.4	23.67	1.1	6.52	10.05	2.14	1	107.55	33.91	10.526	644.46	332.92	6	149.2	9.083	1.691	5.995
Mt. Taibaishan	Quercus aliena var. acutiserrata	Mt. Taibaishan_Quercus aliena var. acutiserrata	Fagaceae	DBF	Deciduous	tree	476.4	464.8	26.43	1.31	9.1	11.07	2.29	4	107.55	33.91	10.526	644.46	332.92	6	149.2	9.083	1.691	5.995
Mt. Taibaishan	Quercus serrata var. brevipetiolata	Mt. Taibaishan_Quercus serrata var. brevipetiolata	Fagaceae	DBF	Deciduous	tree	471.44	461.4	21.83	0.99	7.62	9.66	1.69	2	107.55	33.91	10.526	644.46	332.92	6	149.2	9.083	1.691	5.995
Mt. Taibaishan	Quercus spinosa	Mt. Taibaishan_Quercus spinosa	Fagaceae	DBF	Deciduous	tree	487.1	479.1	22.9	1	5.44	10.27	2.31	1	107.55	33.91	10.526	644.46	332.92	6	149.2	9.083	1.691	5.995
Mt. Taibaishan	Quercus variabilis	Mt. Taibaishan_Quercus variabilis	Fagaceae	DBF	Deciduous	tree	479.41	469.6	24	1.16	5.77	12.46	1.55	2	107.55	33.91	10.526	644.46	332.92	6	149.2	9.083	1.691	5.995
Mt. Taibaishan	Quercus wutaishanica	Mt. Taibaishan_Quercus wutaishanica	Fagaceae	DBF	Deciduous	tree	474.27	464.7	21.78	1.17	7.55	11.53	2.36	1	107.55	33.91	10.526	644.46	332.92	6	149.2	9.083	1.691	5.995
Mt. Taibaishan	Rhododendron aureum	Mt. Taibaishan_Rhododendron aureum	Ericaceae	DBF	Deciduous	tree	495.93	492.1	14.3	0.83	6.33	5.73	1.64	4	107.55	33.91	10.526	644.46	332.92	6	149.2	9.083	1.691	5.995
Mt. Taibaishan	Sorbus discolor	Mt. Taibaishan_Sorbus discolor	Rosaceae	DBF	Deciduous	tree	489.87	483.2	20.6	1.05	14.88	15.89	2.59	2	107.55	33.91	10.526	644.46	332.92	6	149.2	9.083	1.691	5.995
Mt. Taibaishan	Spiraea chinensis	Mt. Taibaishan_Spiraea chinensis	Rosaceae	DBF	Deciduous	shrub	466.47	454.7	23.46	0.92	12.88	15.35	2.88	2	107.55	33.91	10.526	644.46	332.92	6	149.2	9.083	1.691	5.995
Mt. Taibaishan	Spiraea fritschiana	Mt. Taibaishan_Spiraea fritschiana	Rosaceae	DBF	Deciduous	shrub	453.69	440.6	22.18	1.02	15.34	16.47	4.54	1	107.55	33.91	10.526	644.46	332.92	6	149.2	9.083	1.691	5.995
Mt. Taibaishan	Spiraea japonica	Mt. Taibaishan_Spiraea japonica	Rosaceae	DBF	Deciduous	shrub	452.69	441.2	19.6	1	14.17	17.84	4.13	1	107.55	33.91	10.526	644.46	332.92	6	149.2	9.083	1.691	5.995
Mt. Taibaishan	Spiraea pubescens	Mt. Taibaishan_Spiraea pubescens	Rosaceae	DBF	Deciduous	shrub	465.62	457.4	16.95	0.75	12.06	17.7	3.34	1	107.55	33.91	10.526	644.46	332.92	6	149.2	9.083	1.691	5.995
Mt. Taibaishan	Spiraea trilobata	Mt. Taibaishan_Spiraea trilobata	Rosaceae	DBF	Deciduous	shrub	464.14	455.1	18.1	0.94	9.81	14.77	2.69	1	107.55	33.91	10.526	644.46	332.92	6	149.2	9.083	1.691	5.995
Mt. Taibaishan	Tilia dictyoneura	Mt. Taibaishan_Tilia dictyoneura	Tiliaceae	DBF	Deciduous	tree	481.93	469.8	29.77	1.53	15.47	13.09	2.84	1	107.55	33.91	10.526	644.46	332.92	6	149.2	9.083	1.691	5.995
Mt. Taibaishan	Tilia tuan	Mt. Taibaishan_Tilia tuan	Tiliaceae	DBF	Deciduous	tree	449.44	437.5	19.6	0.61	6.26	25.04	5.25	1	107.55	33.91	10.526	644.46	332.92	6	149.2	9.083	1.691	5.995
Mt. Taihangshan	Acer ginnala	Mt. Taihangshan_Acer ginnala	Aceraceae	DBF	Deciduous	tree	483.27	473.1	26.3	1.22	7.99	12.78	2.35	1	113.63	37.2	8.0458	522.4	42.93	3.3	126	3.376	0.57	6.7
Mt. Taihangshan	Betula platyphylla	Mt. Taihangshan_Betula platyphylla	Betulaceae	DBF	Deciduous	tree	498.96	493.4	21.38	0.94	7.83	10.16	2.58	4	113.63	37.2	8.0458	522.4	42.93	3.3	126	3.376	0.57	6.7
Mt. Taihangshan	Betula utilis	Mt. Taihangshan_Betula utilis	Betulaceae	DBF	Deciduous	tree	482.6	471.7	27.55	1.43	10.41	7.37	3.71	2	113.63	37.2	8.0458	522.4	42.93	3.3	126	3.376	0.57	6.7
Mt. Taihangshan	Corylus heterophylla	Mt. Taihangshan_Corylus heterophylla	Betulaceae	DBF	Deciduous	shrub	467.5	456	23.3	1.23	7.87	21.57	2.3	1	113.63	37.2	8.0458	522.4	42.93	3.3	126	3.376	0.57	6.7
Mt. Taihangshan	Corylus mandshurica	Mt. Taihangshan_Corylus mandshurica	Betulaceae	DBF	Deciduous	shrub	439.88	426.8	19.34	0.84	6.4	24.56	3.53	2	113.63	37.2	8.0458	522.4	42.93	3.3	126	3.376	0.57	6.7
Mt. Taihangshan	Cotoneaster acutifolius	Mt. Taihangshan_Cotoneaster acutifolius	Rosaceae	DBF	Deciduous	shrub	458.3	446.8	20.87	1	14.42	13.85	3.82	5	113.63	37.2	8.0458	522.4	42.93	3.3	126	3.376	0.57	6.7
Mt. Taihangshan	Crataegus wilsonii	Mt. Taihangshan_Crataegus wilsonii	Rosaceae	DBF	Deciduous	tree	459.16	449.8	17.58	0.83	12.64	19.47	2.93	3	113.63	37.2	8.0458	522.4	42.93	3.3	126	3.376	0.57	6.7
Mt. Taihangshan	Populus davidiana	Mt. Taihangshan_Populus davidiana	Salicaceae	DBF	Deciduous	tree	478.16	470.2	19.65	0.96	9.82	20.38	2.17	2	113.63	37.2	8.0458	522.4	42.93	3.3	126	3.376	0.57	6.7
Mt. Taihangshan	Quercus wutaishanica	Mt. Taihangshan_Quercus wutaishanica	Fagaceae	DBF	Deciduous	tree	472.33	461.2	24.13	1.1	6.47	12.36	2.02	2	113.63	37.2	8.0458	522.4	42.93	3.3	126	3.376	0.57	6.7
Mt. Taihangshan	Spiraea pubescens	Mt. Taihangshan_Spiraea pubescens	Rosaceae	DBF	Deciduous	shrub	465.83	455.4	20.97	0.88	11.82	16.76	2.95	3	113.63	37.2	8.0458	522.4	42.93	3.3	126	3.376	0.57	6.7
Mt. Taihangshan	Spiraea trilobata	Mt. Taihangshan_Spiraea trilobata	Rosaceae	DBF	Deciduous	shrub	464.93	454.8	20.2	0.76	7.81	20.51	2.23	5	113.63	37.2	8.0458	522.4	42.93	3.3	126	3.376	0.57	6.7
Mt. Taihangshan	Syringa reticulata var. amurensis	Mt. Taihangshan_Syringa reticulata var. amurensis	Oleaceae	DBF	Deciduous	tree	462	453.3	17.03	0.72	9.57	13.57	2.76	1	113.63	37.2	8.0458	522.4	42.93	3.3	126	3.376	0.57	6.7
Mt. Taihangshan	Syringa tomentella	Mt. Taihangshan_Syringa tomentella	Oleaceae	DBF	Deciduous	shrub	447.48	434.8	20.24	0.9	9.72	21.98	3.71	2	113.63	37.2	8.0458	522.4	42.93	3.3	126	3.376	0.57	6.7
Mt. Taiyueshan	Acer ginnala	Mt. Taiyueshan_Acer ginnala	Aceraceae	DBF	Deciduous	tree	462.04	443.8	32	1.7	13.1	15.83	2.93	3	111.99	36.63	11.157	482.25	171.96	5.569	96.72	10.8	2.41	6.676
Mt. Taiyueshan	Acer grosseri	Mt. Taiyueshan_Acer grosseri	Aceracead	DBF	Deciduous	tree	485.34	475.9	25.55	1.09	8.89	6.95	1.97	2	111.99	36.63	11.157	482.25	171.96	5.569	96.72	10.8	2.41	6.676
Mt. Taiyueshan	Betula albosinensis	Mt. Taiyueshan_Betula albosinensis	Betulaceae	DBF	Deciduous	tree	491.63	481	31.5	1.4	10.51	8.13	2.33	6	111.99	36.63	11.157	482.25	171.96	5.569	96.72	10.8	2.41	6.676
Mt. Taiyueshan	Betula platyphylla	Mt. Taiyueshan_Betula platyphylla	Betulaceae	DBF	Deciduous	tree	495.89	487.7	27.7	1.25	8.37	5.97	2.53	3	111.99	36.63	11.157	482.25	171.96	5.569	96.72	10.8	2.41	6.676
Mt. Taiyueshan	Betula utilis	Mt. Taiyueshan_Betula utilis	Betulaceae	DBF	Deciduous	tree	500.33	492.1	30.7	1.2	8.74	6.33	3.72	1	111.99	36.63	11.157	482.25	171.96	5.569	96.72	10.8	2.41	6.676
Mt. Taiyueshan	Carpinus turczaninowii	Mt. Taiyueshan_Carpinus turczaninowii	Betulaceae	DBF	Deciduous	tree	444.28	427.4	25.1	1	6.74	23.16	2.39	1	111.99	36.63	11.157	482.25	171.96	5.569	96.72	10.8	2.41	6.676
Mt. Taiyueshan	Corylus heterophylla	Mt. Taiyueshan_Corylus heterophylla	Betulaceae	DBF	Deciduous	shrub	458.3	440.6	30	1.35	19.13	12.75	2.6	1	111.99	36.63	11.157	482.25	171.96	5.569	96.72	10.8	2.41	6.676
Mt. Taiyueshan	Corylus mandshurica	Mt. Taiyueshan_Corylus mandshurica	Betulaceae	DBF	Deciduous	shrub	440.33	422.1	25.83	0.99	6.55	22.96	3.2	2	111.99	36.63	11.157	482.25	171.96	5.569	96.72	10.8	2.41	6.676
Mt. Taiyueshan	Cotoneaster acutifolius	Mt. Taiyueshan_Cotoneaster acutifolius	Rosaceae	DBF	Deciduous	shrub	461.24	447.9	24.5	1.31	16.07	13.18	2.4	1	111.99	36.63	11.157	482.25	171.96	5.569	96.72	10.8	2.41	6.676
Mt. Taiyueshan	Crataegus kansuensis	Mt. Taiyueshan_Crataegus kansuensis	Rosaceae	DBF	Deciduous	tree	447.18	433.4	21.7	0.93	11.53	13.63	3.27	1	111.99	36.63	11.157	482.25	171.96	5.569	96.72	10.8	2.41	6.676
Mt. Taiyueshan	Populus nigra	Mt. Taiyueshan_Populus nigra	Salicaceae	DBF	Deciduous	tree	448.49	434.7	22	0.93	18.79	19.22	3.4	1	111.99	36.63	11.157	482.25	171.96	5.569	96.72	10.8	2.41	6.676
Mt. Taiyueshan	Quercus wutaishanica	Mt. Taiyueshan_Quercus wutaishanica	Fagaceae	DBF	Deciduous	tree	473.3	460.9	26.78	1.11	6.6	8.48	2.79	2	111.99	36.63	11.157	482.25	171.96	5.569	96.72	10.8	2.41	6.676
Mt. Taiyueshan	Spiraea pubescens	Mt. Taiyueshan_Spiraea pubescens	Rosaceae	DBF	Deciduous	shrub	467.22	453.9	26.28	1.17	14.19	12.87	3.34	20	111.99	36.63	11.157	482.25	171.96	5.569	96.72	10.8	2.41	6.676
Mt. Taiyueshan	Spiraea trilobata	Mt. Taiyueshan_Spiraea trilobata	Rosaceae	DBF	Deciduous	shrub	468.79	458.9	20.8	0.67	12.07	10.67	3	1	111.99	36.63	11.157	482.25	171.96	5.569	96.72	10.8	2.41	6.676
Mt. Taiyueshan	Syringa microphylla	Mt. Taiyueshan_Syringa microphylla	Oleaceae	DBF	Deciduous	tree	470.07	458.3	24.55	1.25	16.48	11.03	2.24	3	111.99	36.63	11.157	482.25	171.96	5.569	96.72	10.8	2.41	6.676
Mt. Taiyueshan	Tilia amurensis	Mt. Taiyueshan_Tilia amurensis	Tiliaceae	DBF	Deciduous	tree	470.71	459.1	24.48	1.43	17.11	12.91	2.26	1	111.99	36.63	11.157	482.25	171.96	5.569	96.72	10.8	2.41	6.676
Mt. Tianlongshan	Broussonetia papyrifera	Mt. Tianlongshan_Broussonetia papyrifera	Moaceae	MDEBF	Deciduous	tree	424.3	413.5	14.22	1.7	13.53	14.31	4.16	2	105.75	26.22	15.984	1115.1	132.32	7.39	74.7	3.067	0.8619	6.484
Mt. Tianlongshan	Buddleja officinalis	Mt. Tianlongshan_Buddleja officinalis	Loganiaceae	MDEBF	Deciduous	shrub	441.17	424.9	23.64	1.45	10.38	18.06	7.75	6	105.75	26.22	15.984	1115.1	132.32	7.39	74.7	3.067	0.8619	6.484
Mt. Tianlongshan	Campylotropis macrocarpa	Mt. Tianlongshan_Campylotropis macrocarpa	Leguminosae	MDEBF	Deciduous	shrub	469.36	460.2	19.6	1	9.94	18.61	3.59	10	105.75	26.22	15.984	1115.1	132.32	7.39	74.7	3.067	0.8619	6.484
Mt. Tianlongshan	Carpinus pubescens	Mt. Tianlongshan_Carpinus pubescens	Betulaceae	MDEBF	Evergreen	tree	446.1	433.2	20.27	0.87	5.38	24.88	2.63	2	105.75	26.22	15.984	1115.1	132.32	7.39	74.7	3.067	0.8619	6.484
Mt. Tianlongshan	Catalpa ovata	Mt. Tianlongshan_Catalpa ovata	Bignoniaceae	MDEBF	Deciduous	tree	451.29	439.3	20.04	1.49	6.2	19.2	4.86	1	105.75	26.22	15.984	1115.1	132.32	7.39	74.7	3.067	0.8619	6.484
Mt. Tianlongshan	Celtis bungeana	Mt. Tianlongshan_Celtis bungeana	Ulmaceae	MDEBF	Deciduous	tree	427.05	416.1	14.73	0.9	6.43	30.65	6.68	3	105.75	26.22	15.984	1115.1	132.32	7.39	74.7	3.067	0.8619	6.484
Mt. Tianlongshan	Celtis julianae	Mt. Tianlongshan_Celtis julianae	Ulmaceae	MDEBF	Deciduous	tree	437.88	424.4	19.5	1.23	23.05	22.54	3.82	2	105.75	26.22	15.984	1115.1	132.32	7.39	74.7	3.067	0.8619	6.484
Mt. Tianlongshan	Celtis sinensis	Mt. Tianlongshan_Celtis sinensis	Ulmaceae	MDEBF	Deciduous	tree	444.97	433.7	17.8	1.01	9.27	21.38	2.86	1	105.75	26.22	15.984	1115.1	132.32	7.39	74.7	3.067	0.8619	6.484
Mt. Tianlongshan	Cladrastis platycarpa	Mt. Tianlongshan_Cladrastis platycarpa	Leguminosae	MDEBF	Deciduous	tree	445.62	432.3	20.75	1.26	13.07	27.61	3.75	1	105.75	26.22	15.984	1115.1	132.32	7.39	74.7	3.067	0.8619	6.484
Mt. Tianlongshan	Coriaria nepalensis	Mt. Tianlongshan_Coriaria nepalensis	Coriariaceae	MDEBF	Deciduous	shrub	464.06	456.9	14.66	0.98	10.38	14.25	3.32	5	105.75	26.22	15.984	1115.1	132.32	7.39	74.7	3.067	0.8619	6.484
Mt. Tianlongshan	Diospyros morrisiana	Mt. Tianlongshan_Diospyros morrisiana	Ebenaceae	MDEBF	Deciduous	tree	423.99	408.3	19.81	1.02	17.02	22.02	2.98	1	105.75	26.22	15.984	1115.1	132.32	7.39	74.7	3.067	0.8619	6.484
Mt. Tianlongshan	Eriobotrya seguinii	Mt. Tianlongshan_Eriobotrya seguinii	Rosaceae	MDEBF	Evergreen	tree	455.45	447.2	15.04	0.86	17.1	15.07	3.34	1	105.75	26.22	15.984	1115.1	132.32	7.39	74.7	3.067	0.8619	6.484
Mt. Tianlongshan	Firmiana simplex	Mt. Tianlongshan_Firmiana simplex	Sterculiaceae	MDEBF	Deciduous	tree	425.09	402.6	27.18	1.42	15.39	30.7	7.71	1	105.75	26.22	15.984	1115.1	132.32	7.39	74.7	3.067	0.8619	6.484
Mt. Tianlongshan	Gleditsia sinensis	Mt. Tianlongshan_Gleditsia sinensis	Leguminosae	MDEBF	Deciduous	tree	443.06	426.7	24.17	1.12	4.09	36.62	5.1	1	105.75	26.22	15.984	1115.1	132.32	7.39	74.7	3.067	0.8619	6.484
Mt. Tianlongshan	Ilex corallina var. aberrans	Mt. Tianlongshan_Ilex corallina var. aberrans	Aquifoliaceae	MDEBF	Evergreen	tree	498.17	494.8	13.4	0.72	10.22	10.45	2.11	6	105.75	26.22	15.984	1115.1	132.32	7.39	74.7	3.067	0.8619	6.484
Mt. Tianlongshan	Itea ilicifolia	Mt. Tianlongshan_Itea ilicifolia	Saxifragaceae	MDEBF	Evergreen	tree	455.74	446.1	17.35	0.9	7.35	19.03	1.61	5	105.75	26.22	15.984	1115.1	132.32	7.39	74.7	3.067	0.8619	6.484
Mt. Tianlongshan	Kalopanax septemlobus	Mt. Tianlongshan_Kalopanax septemlobus	Araliaceae	MDEBF	Deciduous	tree	441.82	428	20.67	1.01	9.14	32.98	2.94	1	105.75	26.22	15.984	1115.1	132.32	7.39	74.7	3.067	0.8619	6.484
Mt. Tianlongshan	Lindera communis	Mt. Tianlongshan_Lindera communis	Lauraceae	MDEBF	Evergreen	tree	487.25	481.3	17.72	1.11	8.93	12.66	2.58	8	105.75	26.22	15.984	1115.1	132.32	7.39	74.7	3.067	0.8619	6.484
Mt. Tianlongshan	Lithocarpus confinis	Mt. Tianlongshan_Lithocarpus confinis	Fagaceae	MDEBF	Evergreen	tree	481.9	478.1	10.69	0.58	2.86	15.17	3.47	2	105.75	26.22	15.984	1115.1	132.32	7.39	74.7	3.067	0.8619	6.484
Mt. Tianlongshan	Machilus cavaleriei	Mt. Tianlongshan_Machilus cavaleriei	Lauraceae	MDEBF	Evergreen	tree	495.61	491.5	15.13	0.83	5.22	6.87	1.62	16	105.75	26.22	15.984	1115.1	132.32	7.39	74.7	3.067	0.8619	6.484
Mt. Tianlongshan	Machilus microcarpa	Mt. Tianlongshan_Machilus microcarpa	Lauraceae	MDEBF	Evergreen	tree	494.1	489.6	15.85	1.07	5.58	12.81	2.64	5	105.75	26.22	15.984	1115.1	132.32	7.39	74.7	3.067	0.8619	6.484
Mt. Tianlongshan	Maesa insignis	Mt. Tianlongshan_Maesa insignis	Myrsinaceae	MDEBF	Evergreen	shrub	429.96	415.5	19.36	1.02	10.84	27.99	3.03	2	105.75	26.22	15.984	1115.1	132.32	7.39	74.7	3.067	0.8619	6.484
Mt. Tianlongshan	Mahonia fortunei	Mt. Tianlongshan_Mahonia fortunei	Rosaceae	MDEBF	Evergreen	shrub	471.84	465.2	15.23	1.01	10.41	11.26	2.17	1	105.75	26.22	15.984	1115.1	132.32	7.39	74.7	3.067	0.8619	6.484
Mt. Tianlongshan	Mallotus repandus	Mt. Tianlongshan_Mallotus repandus	Euphorbiaceae	MDEBF	Evergreen	shrub	436.3	425.8	15.39	0.84	7.71	25.58	5.2	2	105.75	26.22	15.984	1115.1	132.32	7.39	74.7	3.067	0.8619	6.484
Mt. Tianlongshan	Metapanax delavayi	Mt. Tianlongshan_Metapanax delavayi	Araliaceae	MDEBF	Evergreen	shrub	454.71	445.7	16.15	0.95	20.23	19.62	3.39	2	105.75	26.22	15.984	1115.1	132.32	7.39	74.7	3.067	0.8619	6.484
Mt. Tianlongshan	Myrsine africana	Mt. Tianlongshan_Myrsine africana	Myrsinaceae	MDEBF	Evergreen	shrub	463.18	451.9	21.72	1.01	13.89	13.37	2.45	4	105.75	26.22	15.984	1115.1	132.32	7.39	74.7	3.067	0.8619	6.484
Mt. Tianlongshan	Pittosporum trigonocarpum	Mt. Tianlongshan_Pittosporum trigonocarpum	Pittosporaceae	MDEBF	Evergreen	tree	446.55	435.3	18.06	1.5	12.04	18.31	3.26	3	105.75	26.22	15.984	1115.1	132.32	7.39	74.7	3.067	0.8619	6.484
Mt. Tianlongshan	Platycarya longipes	Mt. Tianlongshan_Platycarya longipes	Juglandaceae	MDEBF	Deciduous	tree	447.5	434.5	20.7	0.75	4.59	26.75	3.71	4	105.75	26.22	15.984	1115.1	132.32	7.39	74.7	3.067	0.8619	6.484
Mt. Tianlongshan	Pyracantha fortuneana	Mt. Tianlongshan_Pyracantha fortuneana	Rosaceae	MDEBF	Evergreen	shrub	453.87	445.5	14.97	1.05	13.07	26.42	3.42	1	105.75	26.22	15.984	1115.1	132.32	7.39	74.7	3.067	0.8619	6.484
Mt. Tianlongshan	Pyrus calleryana	Mt. Tianlongshan_Pyrus calleryana	Rosaceae	MDEBF	Deciduous	tree	433.64	419.4	19.71	1.48	23.02	14.47	4.09	1	105.75	26.22	15.984	1115.1	132.32	7.39	74.7	3.067	0.8619	6.484
Mt. Tianlongshan	Quercus aliena	Mt. Tianlongshan_Quercus aliena	Fagaceae	MDEBF	Deciduous	tree	472.67	465.6	16.3	0.94	12.71	15.71	2.78	1	105.75	26.22	15.984	1115.1	132.32	7.39	74.7	3.067	0.8619	6.484
Mt. Tianlongshan	Quercus fabri	Mt. Tianlongshan_Quercus fabri	Fagaceae	MDEBF	Deciduous	tree	457.35	439.8	29.49	1.55	8	27.11	2.99	1	105.75	26.22	15.984	1115.1	132.32	7.39	74.7	3.067	0.8619	6.484
Mt. Tianlongshan	Rhamnella martinii	Mt. Tianlongshan_Rhamnella martinii	Euphorbiaceae	MDEBF	Evergreen	shrub	450.76	419	43.8	2.29	16.41	17.06	4.71	8	105.75	26.22	15.984	1115.1	132.32	7.39	74.7	3.067	0.8619	6.484
Mt. Tianlongshan	Rhamnus calcicolus	Mt. Tianlongshan_Rhamnus calcicolus	Rhamnaceae	MDEBF	Evergreen	shrub	449.89	440.7	15.6	0.78	7.82	25.28	3.49	1	105.75	26.22	15.984	1115.1	132.32	7.39	74.7	3.067	0.8619	6.484
Mt. Tianlongshan	Rhamnus heterophylla	Mt. Tianlongshan_Rhamnus heterophylla	Rhamnaceae	MDEBF	Evergreen	shrub	462.45	451.6	20.82	1.05	10.13	20.05	3.24	1	105.75	26.22	15.984	1115.1	132.32	7.39	74.7	3.067	0.8619	6.484
Mt. Tianlongshan	Rhamnus leptophylla	Mt. Tianlongshan_Rhamnus leptophylla	Rhamnaceae	MDEBF	Evergreen	shrub	424.98	400.3	29.31	1.23	12.97	25.9	5.53	2	105.75	26.22	15.984	1115.1	132.32	7.39	74.7	3.067	0.8619	6.484
Mt. Tianlongshan	Rosa cymosa	Mt. Tianlongshan_Rosa cymosa	Rosaceae	MDEBF	Evergreen	shrub	441.06	425.2	23.11	1.31	12.2	21.2	3.48	1	105.75	26.22	15.984	1115.1	132.32	7.39	74.7	3.067	0.8619	6.484
Mt. Tianlongshan	Rosa odorata	Mt. Tianlongshan_Rosa odorata	Rosaceae	MDEBF	Evergreen	shrub	461.65	451.3	19.78	1	6.88	20.31	3.9	1	105.75	26.22	15.984	1115.1	132.32	7.39	74.7	3.067	0.8619	6.484
Mt. Tianlongshan	Rubus inopertus	Mt. Tianlongshan_Rubus inopertus	Rosaceae	MDEBF	Deciduous	shrub	425.25	411.4	17.93	1.05	15.18	18.78	4.24	2	105.75	26.22	15.984	1115.1	132.32	7.39	74.7	3.067	0.8619	6.484
Mt. Tianlongshan	Rubus parvifolius	Mt. Tianlongshan_Rubus parvifolius	Rosaceae	MDEBF	Deciduous	shrub	448.31	439	15.52	0.91	12.05	18.51	4.69	2	105.75	26.22	15.984	1115.1	132.32	7.39	74.7	3.067	0.8619	6.484
Mt. Tianlongshan	Sarcococca ruscifolia	Mt. Tianlongshan_Sarcococca ruscifolia	Asclepiadaceae	MDEBF	Evergreen	shrub	466.62	458.4	17.16	0.94	8.3	22	2.81	1	105.75	26.22	15.984	1115.1	132.32	7.39	74.7	3.067	0.8619	6.484
Mt. Tianlongshan	Sophora davidii	Mt. Tianlongshan_Sophora davidii	Leguminosae	MDEBF	Deciduous	shrub	474.74	459.2	32.8	1.19	11.28	13.67	2.52	1	105.75	26.22	15.984	1115.1	132.32	7.39	74.7	3.067	0.8619	6.484
Mt. Tianlongshan	Ulmus parvifolia	Mt. Tianlongshan_Ulmus parvifolia	Ulmaceae	MDEBF	Deciduous	tree	435.6	425.5	14.76	1.44	21.37	20.11	2.72	1	105.75	26.22	15.984	1115.1	132.32	7.39	74.7	3.067	0.8619	6.484
Mt. Tianlongshan	Zanthoxylum armatum	Mt. Tianlongshan_Zanthoxylum armatum	Rutaceae	MDEBF	Evergreen	tree	429.83	414.5	20.35	1.3	9.67	25.19	6.02	2	105.75	26.22	15.984	1115.1	132.32	7.39	74.7	3.067	0.8619	6.484
Mt. Tianlongshan	Zanthoxylum dimorphophyllum	Mt. Tianlongshan_Zanthoxylum dimorphophyllum	Rutaceae	MDEBF	Evergreen	tree	447.03	434.3	20.22	0.96	6.37	24.94	2.52	1	105.75	26.22	15.984	1115.1	132.32	7.39	74.7	3.067	0.8619	6.484
Mt. Tianlongshan	Zanthoxylum simulans	Mt. Tianlongshan_Zanthoxylum simulans	Rutaceae	MDEBF	Deciduous	tree	458.33	445.6	22.78	1.35	21.6	18.65	3.99	1	105.75	26.22	15.984	1115.1	132.32	7.39	74.7	3.067	0.8619	6.484
Mt. Wutong	Cinnamomum micranthum	Mt. Wutong_Cinnamomum micranthum	Lauraceae	EBF	Evergreen	tree	519.4	517.9	14.01	0.71	6.51	4.46	2.74	3	114.18	22.4	23.078	1894.2	83.83	4.573	50.2	0.4781	0.0836	5.268
Mt. Wutong	Liriodendron chinense	Mt. Wutong_Liriodendron chinense	Magnoliaceae	EBF	Evergreen	tree	464.81	454.9	19.79	1.23	6.95	3.13	1.4	3	114.18	22.4	23.078	1894.2	83.83	4.573	50.2	0.4781	0.0836	5.268
Mt. Wutong	Magnolia grandiflora	Mt. Wutong_Magnolia grandiflora	Magnoliaceae	EBF	Evergreen	tree	414.42	408.2	7.85	0.98	9.17	21.9	1.71	4	114.18	22.4	23.078	1894.2	83.83	4.573	50.2	0.4781	0.0836	5.268
Mt. Wutong	Manglietia dandyi	Mt. Wutong_Manglietia dandyi	Magnoliaceae	EBF	Evergreen	tree	487.31	480.6	19.74	0.94	18.97	8.44	2.27	2	114.18	22.4	23.078	1894.2	83.83	4.573	50.2	0.4781	0.0836	5.268
Mt. Wutong	Manglietia paruicula	Mt. Wutong_Manglietia paruicula	Magnoliaceae	EBF	Evergreen	tree	504.39	501.6	13.35	0.57	7.17	4.08	1.24	1	114.18	22.4	23.078	1894.2	83.83	4.573	50.2	0.4781	0.0836	5.268
Mt. Wutong	Michelia balansae	Mt. Wutong_Michelia balansae	Magnoliaceae	EBF	Evergreen	tree	419.78	411.2	11.09	0.59	3.58	10.82	1.69	6	114.18	22.4	23.078	1894.2	83.83	4.573	50.2	0.4781	0.0836	5.268
Mt. Wutong	Michelia cavaleriei	Mt. Wutong_Michelia cavaleriei	Magnoliaceae	EBF	Evergreen	tree	500.99	494.9	24.29	0.51	10.98	4.43	2.4	1	114.18	22.4	23.078	1894.2	83.83	4.573	50.2	0.4781	0.0836	5.268
Mt. Wutong	Michelia champaca	Mt. Wutong_Michelia champaca	Magnoliaceae	EBF	Evergreen	tree	465.19	456.5	17.72	0.98	10.79	13.07	2.47	1	114.18	22.4	23.078	1894.2	83.83	4.573	50.2	0.4781	0.0836	5.268
Mt. Wutong	Michelia chapensis	Mt. Wutong_Michelia chapensis	Magnoliaceae	EBF	Evergreen	tree	493.16	488.6	15.73	0.76	6.6	4.78	1.06	2	114.18	22.4	23.078	1894.2	83.83	4.573	50.2	0.4781	0.0836	5.268
Mt. Wutong	Michelia fulva	Mt. Wutong_Michelia fulva	Magnoliaceae	EBF	Evergreen	tree	500.36	490.6	35.17	1.23	7.41	6.93	1.58	1	114.18	22.4	23.078	1894.2	83.83	4.573	50.2	0.4781	0.0836	5.268
Mt. Wutong	Michelia macclurei	Mt. Wutong_Michelia macclurei	Magnoliaceae	EBF	Evergreen	tree	515.35	513	17.08	0.69	8.36	5.51	1.72	2	114.18	22.4	23.078	1894.2	83.83	4.573	50.2	0.4781	0.0836	5.268
Mt. Wutong	Michelia maudiae	Mt. Wutong_Michelia maudiae	Magnoliaceae	EBF	Evergreen	tree	478.92	474.6	11.44	0.9	7.07	4.41	1.42	3	114.18	22.4	23.078	1894.2	83.83	4.573	50.2	0.4781	0.0836	5.268
Mt. Wutong	Michelia odora	Mt. Wutong_Michelia odora	Magnoliaceae	EBF	Evergreen	tree	498.69	494.5	16.54	0.7	5.67	3.94	1.33	1	114.18	22.4	23.078	1894.2	83.83	4.573	50.2	0.4781	0.0836	5.268
Mt. Wutong	Michelia wilsonii	Mt. Wutong_Michelia wilsonii	Magnoliaceae	EBF	Evergreen	tree	470.11	462.8	16.19	1.28	25.72	11.62	3.69	2	114.18	22.4	23.078	1894.2	83.83	4.573	50.2	0.4781	0.0836	5.268
Mt. Wutong	Parakmeria lotungensis	Mt. Wutong_Parakmeria lotungensis	Magnoliaceae	EBF	Evergreen	tree	497.47	491.2	22.89	0.83	15.18	3.82	3.86	2	114.18	22.4	23.078	1894.2	83.83	4.573	50.2	0.4781	0.0836	5.268
Mt. Wutong	Parakmeria yunnanensis	Mt. Wutong_Parakmeria yunnanensis	Magnoliaceae	EBF	Evergreen	tree	473.87	470	9.53	0.66	4.21	3.06	1.9	2	114.18	22.4	23.078	1894.2	83.83	4.573	50.2	0.4781	0.0836	5.268
Mt. Wutong	Paramichelia baillonii	Mt. Wutong_Paramichelia baillonii	Magnoliaceae	EBF	Evergreen	tree	505.49	505.3	1	1.44	17.6	11.19	1.81	3	114.18	22.4	23.078	1894.2	83.83	4.573	50.2	0.4781	0.0836	5.268
Mt. Ziwuling	Acer ginnala	Mt. Ziwuling_Acer ginnala	Aceraceae	DBF	Deciduous	tree	479.64	472.5	18.28	1.06	8.67	10.23	2.13	3	108.25	36	9.6713	478.47	25.2	3.81	145.08	4.2	0.95	8.282
Mt. Ziwuling	Betula platyphylla	Mt. Ziwuling_Betula platyphylla	Betulaceae	DBF	Deciduous	tree	500.49	494.9	22.32	1.22	10.82	10.17	2.68	2	108.25	36	9.6713	478.47	25.2	3.81	145.08	4.2	0.95	8.282
Mt. Ziwuling	Celtis sinensis	Mt. Ziwuling_Celtis sinensis	Fagaceae	DBF	Deciduous	tree	474.71	464.9	22.38	0.92	7.9	13.62	1.94	2	108.25	36	9.6713	478.47	25.2	3.81	145.08	4.2	0.95	8.282
Mt. Ziwuling	Corylus heterophylla	Mt. Ziwuling_Corylus heterophylla	Betulaceae	DBF	Deciduous	shrub	452.18	440.5	19.77	1.07	9.16	15.99	2.52	2	108.25	36	9.6713	478.47	25.2	3.81	145.08	4.2	0.95	8.282
Mt. Ziwuling	Cotoneaster multiflorus	Mt. Ziwuling_Cotoneaster multiflorus	Rosaceae	DBF	Deciduous	shrub	464.68	455.5	18.48	0.92	10.94	19.61	3.06	1	108.25	36	9.6713	478.47	25.2	3.81	145.08	4.2	0.95	8.282
Mt. Ziwuling	Cotoneaster zabelii	Mt. Ziwuling_Cotoneaster zabelii	Rosaceae	DBF	Deciduous	shrub	474.07	466.4	17.9	0.89	10.02	18.49	4.26	4	108.25	36	9.6713	478.47	25.2	3.81	145.08	4.2	0.95	8.282
Mt. Ziwuling	Crataegus kansuensis	Mt. Ziwuling_Crataegus kansuensis	Rosaceae	DBF	Deciduous	tree	451.62	441.9	16.7	0.78	14	21.26	3.53	2	108.25	36	9.6713	478.47	25.2	3.81	145.08	4.2	0.95	8.282
Mt. Ziwuling	Euonymus verrucosoides	Mt. Ziwuling_Euonymus verrucosoides	Celastraceae	DBF	Deciduous	shrub	465.86	457.7	16.9	0.86	8.77	24.15	3.28	1	108.25	36	9.6713	478.47	25.2	3.81	145.08	4.2	0.95	8.282
Mt. Ziwuling	Populus davidiana	Mt. Ziwuling_Populus davidiana	Salicaceae	DBF	Deciduous	tree	482.06	475	18.83	1.1	11.54	21.74	2.27	3	108.25	36	9.6713	478.47	25.2	3.81	145.08	4.2	0.95	8.282
Mt. Ziwuling	Quercus dentata	Mt. Ziwuling_Quercus dentata	Fagaceae	DBF	Deciduous	tree	470.31	460.7	20.7	0.82	4.71	12.48	2.62	1	108.25	36	9.6713	478.47	25.2	3.81	145.08	4.2	0.95	8.282
Mt. Ziwuling	Quercus wutaishanica	Mt. Ziwuling_Quercus wutaishanica	Fagaceae	DBF	Deciduous	tree	466.19	455.2	22.04	1.04	6.81	12.25	2.3	3	108.25	36	9.6713	478.47	25.2	3.81	145.08	4.2	0.95	8.282
Mt. Ziwuling	Spiraea pubescens	Mt. Ziwuling_Spiraea pubescens	Rosaceae	DBF	Deciduous	shrub	469.09	460.3	18.83	1.06	13.97	14.66	3.04	2	108.25	36	9.6713	478.47	25.2	3.81	145.08	4.2	0.95	8.282
Mt. Ziwuling	Spiraea trilobata	Mt. Ziwuling_Spiraea trilobata	Rosaceae	DBF	Deciduous	shrub	479.32	470.3	22.3	0.79	10.09	16.16	2.65	3	108.25	36	9.6713	478.47	25.2	3.81	145.08	4.2	0.95	8.282
Mt. Ziwuling	Swida bretchneideri	Mt. Ziwuling_Swida bretchneideri	Cornaceae	DBF	Deciduous	tree	433.83	420.2	19	1.42	8.84	34.09	4.3	1	108.25	36	9.6713	478.47	25.2	3.81	145.08	4.2	0.95	8.282
Mt. Ziwuling	Syringa pekinensis	Mt. Ziwuling_Syringa pekinensis	Oleaceae	DBF	Deciduous	tree	477.09	465.9	25.9	1.41	17.94	11.28	2.42	2	108.25	36	9.6713	478.47	25.2	3.81	145.08	4.2	0.95	8.282
Xishuangbanna	Barringtonia racemosa	Xishuangbanna_Barringtonia racemosa	Lecythidaceae	EBF	Evergreen	tree	501.93	496.6	22.2	0.49	6.13	8.9	1.65	3	101.25	21.41	21.913	1407.5	87.12	4.413	40	0.3387	0.2138	5.326
Xishuangbanna	Castanopsis echinocarpa	Xishuangbanna_Castanopsis echinocarpa	Fagaceae	EBF	Evergreen	tree	499.47	495.5	16.08	0.76	14.7	5.93	1.66	8	101.25	21.41	21.913	1407.5	87.12	4.413	40	0.3387	0.2138	5.326
Xishuangbanna	Garcinia cowa	Xishuangbanna_Garcinia cowa	Clusiaceae	EBF	Evergreen	tree	443.66	428.9	22.26	0.68	9.37	14.84	2.44	4	101.25	21.41	21.913	1407.5	87.12	4.413	40	0.3387	0.2138	5.326
Xishuangbanna	Macropanax undulatum	Xishuangbanna_Macropanax undulatum	Araliaceae	EBF	Evergreen	tree	427.26	416.1	15.02	0.95	6.59	19.99	1.93	3	101.25	21.41	21.913	1407.5	87.12	4.413	40	0.3387	0.2138	5.326
Xishuangbanna	Mezzettiopsis creaghii	Xishuangbanna_Mezzettiopsis creaghii	Annonaceae	EBF	Evergreen	tree	454.93	440.4	24.58	0.81	6.54	8.91	2.19	3	101.25	21.41	21.913	1407.5	87.12	4.413	40	0.3387	0.2138	5.326
Xishuangbanna	Microtropis discolor	Xishuangbanna_Microtropis discolor	Celastraceae	EBF	Evergreen	tree	444.07	437.9	10.16	1.24	6.75	10.3	2.42	2	101.25	21.41	21.913	1407.5	87.12	4.413	40	0.3387	0.2138	5.326
Xishuangbanna	Millettia leptobotrya	Xishuangbanna_Millettia leptobotrya	Fabaceae	EBF	Evergreen	tree	512.03	507	28.75	1.3	9.98	20.35	2.51	4	101.25	21.41	21.913	1407.5	87.12	4.413	40	0.3387	0.2138	5.326
Xishuangbanna	Mycetia gracilis	Xishuangbanna_Mycetia gracilis	Rubiaceae	EBF	Evergreen	shrub	482.75	476.2	17.82	0.99	14.96	12.28	1.81	5	101.25	21.41	21.913	1407.5	87.12	4.413	40	0.3387	0.2138	5.326
Xishuangbanna	Olea rosea	Xishuangbanna_Olea rosea	Oleaceae	EBF	Evergreen	tree	483.94	481.7	6.73	0.87	19.41	15.22	4.33	4	101.25	21.41	21.913	1407.5	87.12	4.413	40	0.3387	0.2138	5.326
Xishuangbanna	Phoebe lanceolata	Xishuangbanna_Phoebe lanceolata	Lauraceae	EBF	Evergreen	tree	500.3	496.5	15.79	0.95	20.53	10.35	8.22	8	101.25	21.41	21.913	1407.5	87.12	4.413	40	0.3387	0.2138	5.326
Xishuangbanna	Pithecellobium clypearia	Xishuangbanna_Pithecellobium clypearia	Fabaceae	EBF	Evergreen	tree	513.18	508.4	28.75	1.27	8.82	4.12	2.37	3	101.25	21.41	21.913	1407.5	87.12	4.413	40	0.3387	0.2138	5.326
Xishuangbanna	Pometia tomentosa	Xishuangbanna_Pometia tomentosa	Sapindaceae	EBF	Evergreen	tree	522.81	521.1	19.64	0.71	14.36	8.25	3.76	3	101.25	21.41	21.913	1407.5	87.12	4.413	40	0.3387	0.2138	5.326
Xishuangbanna	Saurauia tristyla	Xishuangbanna_Saurauia tristyla	Actinidiaceae	EBF	Evergreen	tree	467.89	460	16.84	1.07	5.62	7.8	1.77	8	101.25	21.41	21.913	1407.5	87.12	4.413	40	0.3387	0.2138	5.326
Xishuangbanna	Syzygium globiflorum	Xishuangbanna_Syzygium globiflorum	Myrtaceae	EBF	Evergreen	tree	501.02	497.6	14.61	1.01	40.97	3.98	4.57	8	101.25	21.41	21.913	1407.5	87.12	4.413	40	0.3387	0.2138	5.326

## Sheet: Individual_traits_of_2_species
Species	Sampling sites	C	CS	N	P	K	Ca	Mg	Longitude (E, °)	Latitude (N, °)	Elevation (m)	MAT	MAP	AN	AP	AK	Ca2+	Mg2+	pH
Betula platyphylla	Mt. Taiyueshan	502.3	495.96	26	0.8	6.52	8.44	3.36	112.01	36.43	1810	11.157	482.25	42.51	3.661	112	2.184	1.006	8.043
Betula platyphylla	Mt. Taiyueshan	496.8	490.65	22.2	0.77	7.63	7.92	2.52	112.01	36.43	1810	11.157	482.25	42.51	3.661	112	2.184	1.006	8.043
Betula platyphylla	Mt. Taiyueshan	491.3	482.39	27.1	0.86	11.65	9.49	3.57	112.01	36.43	1810	11.157	482.25	42.51	3.661	112	2.184	1.006	8.043
Betula platyphylla	Mt. Taiyueshan	507.7	501.96	27.8	1.25	5.72	4.72	3.13	112.01	36.59	2186	11.157	482.25	171.96	3.744	252.62	10.56	2.472	6.323
Betula platyphylla	Mt. Taiyueshan	490.7	481.3	28	1.12	9.23	6.8	2.98	112.01	36.59	2186	11.157	482.25	171.96	3.744	252.62	10.56	2.472	6.323
Betula platyphylla	Mt. Taiyueshan	506.1	498.42	33.6	1.33	9.71	4.84	2.22	112.01	36.59	2186	11.157	482.25	171.96	3.744	252.62	10.56	2.472	6.323
Betula platyphylla	Mt. Ziwuling	494	488.24	19.7	1.36	8.02	12.98	3.62	108.53	35.65	1590	10.733	513.79	25.2	3.81	145.08	4.2	0.95	8.282
Betula platyphylla	Mt. Ziwuling	526.7	525.16	25	0.8	13.67	6.71	2.18	108.53	35.65	1590	10.733	513.79	25.2	3.81	145.08	4.2	0.95	8.282
Betula platyphylla	Mt. Ziwuling	492	484.37	24.1	1.34	15.31	6.4	1.93	108.53	35.65	1590	10.733	513.79	25.2	3.81	145.08	4.2	0.95	8.282
Betula platyphylla	Mt. Ziwuling	485	475.25	26.1	1.64	12.16	15.18	4.42	108.55	35.66	1400	10.733	513.79	25.2	3.81	145.08	4.2	0.95	8.282
Betula platyphylla	Mt. Ziwuling	511.2	507.55	21.3	0.78	8.47	7.72	2.21	108.55	35.66	1400	10.733	513.79	25.2	3.81	145.08	4.2	0.95	8.282
Betula platyphylla	Mt. Ziwuling	519.2	516.4	24.1	1.02	9.39	5.91	2.47	108.55	35.66	1400	10.733	513.79	25.2	3.81	145.08	4.2	0.95	8.282
Betula platyphylla	Mt. Ziwuling	510.3	506.15	23	1.06	7.84	5.25	3.14	108.65	35.1	1295	10.964	559.46	130	2	144	14.16	2.62	8.18
Betula platyphylla	Mt. Ziwuling	500.7	494.79	23.5	1.3	11.97	5.85	2.09	108.65	35.1	1295	10.964	559.46	130	2	144	14.16	2.62	8.18
Betula platyphylla	Mt. Ziwuling	504	499.6	19.9	1.51	9.65	8.9	2.49	109.68	36.09	1244	10.747	507.86	31.5	4.405	147	4.2	0.95	8.186
Betula platyphylla	Mt. Ziwuling	500.9	495.49	21.9	1.48	13.03	9.18	2.15	109.68	36.09	1244	10.747	507.86	31.5	4.405	147	4.2	0.95	8.186
Betula platyphylla	Mt. Taiyueshan	493.7	484.98	27.9	1.03	11.15	11.12	2.83	109.68	36.09	1244	10.747	507.86	31.5	4.405	147	4.2	0.95	8.186
Betula platyphylla	Mt. Huanglongshan	488.1	480.31	22.8	1.12	9.61	12.77	2.14	109.97	35.63	1530	12.318	533.26	41.84	5.109	172	3.376	0.8732	8.295
Betula platyphylla	Mt. Huanglongshan	492	482.12	29.9	1.12	6.56	8.43	3.17	109.97	35.63	1530	12.318	533.26	41.84	5.109	172	3.376	0.8732	8.295
Betula platyphylla	Mt. Huanglongshan	497.6	491.95	21	1.02	9.24	8.75	3.01	110.02	35.67	1700	12.318	533.26	130	4.8	144	14.16	2.62	7.999
Betula platyphylla	Mt. Huanglongshan	495.8	487.63	27.6	1	10.05	10.06	2.69	110.02	35.67	1700	12.318	533.26	130	4.8	144	14.16	2.62	7.999
Betula platyphylla	Mt. Taiyueshan	495.4	488.85	22.7	1.42	11.78	7.86	2.84	111.85	36.41	1525	11.157	482.25	202	4.231	109.3	10.53	2.446	6.759
Betula platyphylla	Mt. Taiyueshan	516.7	512.02	32.6	1.5	16.33	6.11	1.87	111.85	36.41	1525	11.157	482.25	202	4.231	109.3	10.53	2.446	6.759
Betula platyphylla	Mt. Taiyueshan	484	473.37	27.6	0.95	10.89	13.24	3.65	111.85	36.41	1616	11.157	482.25	202	4.231	109.3	10.53	2.446	6.759
Betula platyphylla	Mt. Taiyueshan	484.2	474.88	24.8	0.99	13.71	9.82	2.63	111.85	36.41	1616	11.157	482.25	202	4.231	109.3	10.53	2.446	6.759
Betula platyphylla	Mt. Taiyueshan	494.9	488.27	22.7	0.53	3.39	8.36	1.91	111.87	36.42	1708	11.157	482.25	171.96	3.744	252.62	10.56	2.472	6.323
Betula platyphylla	Mt. Taiyueshan	514.2	511.26	19.8	0.63	3.48	6.99	2.74	111.87	36.42	1708	11.157	482.25	171.96	3.744	252.62	10.56	2.472	6.323
Betula platyphylla	Mt. Taiyueshan	482.8	474.21	22.6	1.01	14.5	14.4	4.12	111.87	36.42	1708	11.157	482.25	171.96	3.744	252.62	10.56	2.472	6.323
Betula platyphylla	Mt. Taiyueshan	497.3	488.56	30.1	1.14	9.12	9.26	2.94	111.87	36.44	2015	11.157	482.25	171.96	3.744	252.62	10.56	2.472	6.323
Betula platyphylla	Mt. Taiyueshan	507.3	501.4	28.1	1.18	9.79	5.94	2.53	111.87	36.44	2015	11.157	482.25	171.96	3.744	252.62	10.56	2.472	6.323
Betula platyphylla	Mt. Taiyueshan	500.1	491.65	31.2	1.26	11.97	6.59	3.44	111.87	36.44	2015	11.157	482.25	171.96	3.744	252.62	10.56	2.472	6.323
Betula platyphylla	Mt. Taiyueshan	502.7	496.26	26.6	1.29	7.3	6.75	3.55	111.87	36.44	2222	11.157	482.25	171.96	3.744	252.62	10.56	2.472	6.323
Betula platyphylla	Mt. Taiyueshan	501.3	493.55	29.9	1.42	7.64	7.7	2.57	111.87	36.44	2222	11.157	482.25	171.96	3.744	252.62	10.56	2.472	6.323
Betula platyphylla	Mt. Taiyueshan	501.7	494.36	28.9	1.3	7.91	8.51	2.5	111.87	36.44	2222	11.157	482.25	171.96	3.744	252.62	10.56	2.472	6.323
Betula platyphylla	Mt. Taihangshan	493.7	487.29	21.5	0.94	6.2	12.41	3.2	111.88	36.43	1828	11.157	482.25	118	6.328	143	14.16	2.62	8.302
Betula platyphylla	Mt. Taihangshan	499.9	495.11	19.2	0.75	7.24	10.95	2.67	111.88	36.43	1828	11.157	482.25	118	6.328	143	14.16	2.62	8.302
Betula platyphylla	Mt. Taihangshan	500.8	495.86	20.2	0.93	8.8	10.65	2.08	111.88	36.43	1828	11.157	482.25	118	6.328	143	14.16	2.62	8.302
Betula platyphylla	Mt. Taiyueshan	498.1	491.46	24.4	0.83	8.95	6.19	2.14	111.88	36.44	1914	11.157	482.25	118	6.328	143	14.16	2.62	8.302
Betula platyphylla	Mt. Taiyueshan	503.7	497.15	27.7	0.99	9.08	7.36	2.26	111.88	36.44	1914	11.157	482.25	118	6.328	143	14.16	2.62	8.302
Betula platyphylla	Mt. Taiyueshan	492.5	484.44	25.5	1.13	7.68	10.26	1.91	112.01	36.59	2094	11.157	482.25	171.96	3.744	252.62	10.56	2.472	6.323
Betula platyphylla	Mt. Taiyueshan	479.1	470.47	21.4	1.8	8.08	15.6	3.09	112.01	36.59	2094	11.157	482.25	171.96	3.744	252.62	10.56	2.472	6.323
Betula platyphylla	Mt. Taiyueshan	486.5	476.57	27.2	1.3	9.81	7.82	2.98	112.01	36.59	2094	11.157	482.25	171.96	3.744	252.62	10.56	2.472	6.323
Betula platyphylla	Mt. Taihangshan	501.2	495.38	23.5	0.95	8.4	8.12	2.87	113.48	37.11	1608	8.0458	522.4	24	2	101	3.376	0.57	7.95
Betula platyphylla	Mt. Taihangshan	499.2	493.34	22.5	1.14	8.48	8.64	2.59	113.48	37.11	1608	8.0458	522.4	24	2	101	3.376	0.57	7.95
Betula platyphylla	Mt. Taihangshan	502.5	495.99	26.7	1.42	9.9	7.12	2.54	113.5	37.13	1704	8.0458	522.4	24	2	101	3.376	0.57	7.95
Betula platyphylla	Mt. Taihangshan	508.3	503.07	26.2	1.54	10.06	6.98	2.4	113.5	37.13	1704	8.0458	522.4	24	2	101	3.376	0.57	7.95
Betula platyphylla	Mt. Taihangshan	490.5	483.18	22.6	1.33	10.3	8.33	2.7	113.5	37.13	1704	8.0458	522.4	24	2	101	3.376	0.57	7.95
Quercus wutaishanica	Mt. Guanshan	460.5	444.08	28.9	1.61	9.02	13.06	2.93	106.68	34.71	1800	8.8538	545.81	396.3	16.15	171.75	11.04	3.643	6.186
Quercus wutaishanica	Mt. Guanshan	466.4	449.98	30.9	1.44	6.8	10.28	2.15	106.68	34.71	1800	8.8538	545.81	396.3	16.15	171.75	11.04	3.643	6.186
Quercus wutaishanica	Mt. Guanshan	477.1	462.85	31.6	1.75	8.32	8.43	3.13	106.68	34.71	1800	8.8538	545.81	396.3	16.15	171.75	11.04	3.643	6.186
Quercus wutaishanica	Mt. Guanshan	464.2	449.95	26.8	1.76	10.6	12.83	3.14	106.68	34.73	1704	8.8538	545.81	19.06	1.972	43.12	1.684	0.3484	7.841
Quercus wutaishanica	Mt. Guanshan	478.8	467.24	27.3	1.27	6.25	7.1	2.06	106.68	34.73	1704	8.8538	545.81	19.06	1.972	43.12	1.684	0.3484	7.841
Quercus wutaishanica	Mt. Guanshan	466.5	451.84	28.2	1.35	8.33	9.29	2.69	106.68	34.73	1704	8.8538	545.81	19.06	1.972	43.12	1.684	0.3484	7.841
Quercus wutaishanica	Mt. Taibaishan	469.9	457.27	26	1.25	5.66	7.37	2.3	107.7	34.06	2000	10.526	644.46	202	5.637	108.4	10.53	2.446	6.456
Quercus wutaishanica	Mt. Taibaishan	478.2	466.77	26.8	0.96	5.31	11.34	3.44	107.7	34.06	2000	10.526	644.46	202	5.637	108.4	10.53	2.446	6.456
Quercus wutaishanica	Mt. Taibaishan	481.3	469.41	29	1.06	8.14	9.85	2.58	107.7	34.06	2000	10.526	644.46	202	5.637	108.4	10.53	2.446	6.456
Quercus wutaishanica	Mt. Taibaishan	468.4	456.07	25	1.63	6.62	10.81	2.99	107.7	34.06	2303	10.526	644.46	202	5.637	108.4	10.53	2.446	6.456
Quercus wutaishanica	Mt. Taibaishan	462.5	448.17	26.4	1.22	6.4	12.88	2.08	107.7	34.06	2303	10.526	644.46	202	5.637	108.4	10.53	2.446	6.456
Quercus wutaishanica	Mt. Taibaishan	468.4	452.14	31.4	1.55	7.77	12.6	2.32	107.7	34.06	2303	10.526	644.46	202	5.637	108.4	10.53	2.446	6.456
Quercus wutaishanica	Mt. Taibaishan	457.8	445.3	22.3	1.23	6.09	14.98	3.2	107.71	34.05	2136	10.526	644.46	202	5.637	108.4	10.53	2.446	6.456
Quercus wutaishanica	Mt. Taibaishan	472.2	462.03	22.3	1.22	6.32	11.69	2.04	107.71	34.05	2136	10.526	644.46	202	5.637	108.4	10.53	2.446	6.456
Quercus wutaishanica	Mt. Taibaishan	473.2	463.09	22.5	1.14	8.8	7.64	2.34	107.71	34.05	2136	10.526	644.46	202	5.637	108.4	10.53	2.446	6.456
Quercus wutaishanica	Mt. Taibaishan	462.5	450.51	22.7	1.11	6.38	17.4	2.75	107.71	34.05	2231	10.526	644.46	202	5.637	108.4	10.53	2.446	6.456
Quercus wutaishanica	Mt. Taibaishan	459.9	447.29	23	1.31	7.02	12.85	2.74	107.71	34.05	2231	10.526	644.46	202	5.637	108.4	10.53	2.446	6.456
Quercus wutaishanica	Mt. Taibaishan	449.7	434.79	23.8	1.08	7.14	21.27	2.9	107.71	34.05	2231	10.526	644.46	202	5.637	108.4	10.53	2.446	6.456
Quercus wutaishanica	Mt. Ziwuling	472.9	461.07	25.6	1.48	7.64	11.63	2.08	108.53	35.65	1590	10.733	513.79	25.2	3.81	145.08	4.2	0.95	8.282
Quercus wutaishanica	Mt. Ziwuling	467.6	454.58	25.9	0.96	6.25	13.8	1.76	108.53	35.65	1590	10.733	513.79	25.2	3.81	145.08	4.2	0.95	8.282
Quercus wutaishanica	Mt. Ziwuling	468	459.03	18.9	0.84	7.01	12.35	2.7	108.53	35.65	1590	10.733	513.79	25.2	3.81	145.08	4.2	0.95	8.282
Quercus wutaishanica	Mt. Ziwuling	464.6	452.9	22.8	0.95	7.03	10.01	1.61	108.55	35.66	1400	10.733	513.79	25.2	3.81	145.08	4.2	0.95	8.282
Quercus wutaishanica	Mt. Ziwuling	476.4	466.61	22.9	1.13	6.57	11.43	2.28	108.55	35.66	1400	10.733	513.79	25.2	3.81	145.08	4.2	0.95	8.282
Quercus wutaishanica	Mt. Ziwuling	478.1	468.4	23.3	1.03	7.13	10.52	1.93	108.55	35.66	1400	10.733	513.79	25.2	3.81	145.08	4.2	0.95	8.282
Quercus wutaishanica	Mt. Ziwuling	459.7	446.74	23.5	1.01	5.54	14.91	4.27	108.55	35.66	1510	10.733	513.79	25.2	3.81	145.08	4.2	0.95	8.282
Quercus wutaishanica	Mt. Ziwuling	470.3	458.88	24	1.04	7.61	12.1	1.93	108.55	35.66	1510	10.733	513.79	25.2	3.81	145.08	4.2	0.95	8.282
Quercus wutaishanica	Mt. Ziwuling	473.8	462.89	24.2	1.02	5.94	10.47	1.78	108.55	35.66	1510	10.733	513.79	25.2	3.81	145.08	4.2	0.95	8.282
Quercus wutaishanica	Mt. Ziwuling	457.5	445.4	21.6	1.26	7.84	16.96	1.93	108.61	35.66	1310	10.733	513.79	19.06	2.286	43.12	1.684	0.3484	7.558
Quercus wutaishanica	Mt. Ziwuling	471.7	461.66	21.9	1.09	6.79	8.01	2.08	108.61	35.66	1310	10.733	513.79	19.06	2.286	43.12	1.684	0.3484	7.558
Quercus wutaishanica	Mt. Ziwuling	463.4	451.68	22.5	0.98	5.96	12.57	3.37	108.61	35.66	1310	10.733	513.79	19.06	2.286	43.12	1.684	0.3484	7.558
Quercus wutaishanica	Mt. Ziwuling	479.6	472.05	19.2	1.05	8.04	9.31	1.74	108.65	35.1	1295	10.964	559.46	130	2	144	14.16	2.62	8.18
Quercus wutaishanica	Mt. Ziwuling	467.2	456.84	21.2	1.2	6.4	9.27	2.31	108.65	35.1	1295	10.964	559.46	130	2	144	14.16	2.62	8.18
Quercus wutaishanica	Mt. Ziwuling	452.5	439.76	21.4	1.33	6.81	15.59	2.4	108.65	35.1	1295	10.964	559.46	130	2	144	14.16	2.62	8.18
Quercus wutaishanica	Mt. Ziwuling	467.2	458.34	18.5	0.77	6.27	14.9	3.03	108.69	35.65	1252	10.733	513.79	19.06	2.286	43.12	1.684	0.3484	7.558
Quercus wutaishanica	Mt. Ziwuling	454.2	443.57	18.6	0.79	6.25	21.76	3.25	108.69	35.65	1252	10.733	513.79	19.06	2.286	43.12	1.684	0.3484	7.558
Quercus wutaishanica	Mt. Ziwuling	460.7	450.93	18.6	0.72	4.4	13.8	2.21	108.69	35.65	1252	10.733	513.79	19.06	2.286	43.12	1.684	0.3484	7.558
Quercus wutaishanica	Mt. Huanglongshan	476.2	460.51	33.7	1.58	7.52	8.4	2.49	109.95	35.61	1330	12.318	533.26	41.84	5.109	172	3.376	0.8732	8.295
Quercus wutaishanica	Mt. Huanglongshan	469.8	459.35	22.1	1.13	5.62	7.59	2.92	109.95	35.61	1330	12.318	533.26	41.84	5.109	172	3.376	0.8732	8.295
Quercus wutaishanica	Mt. Huanglongshan	468.7	457.85	22.5	1.19	5.36	10.06	2.51	109.95	35.61	1330	12.318	533.26	41.84	5.109	172	3.376	0.8732	8.295
Quercus wutaishanica	Mt. Huanglongshan	466.9	455.7	22.6	1.16	6.38	12.62	2.35	109.97	35.63	1400	12.318	533.26	41.84	5.109	172	3.376	0.8732	8.295
Quercus wutaishanica	Mt. Huanglongshan	472.2	461.5	23.3	1.05	7.16	9.81	1.99	109.97	35.63	1400	12.318	533.26	41.84	5.109	172	3.376	0.8732	8.295
Quercus wutaishanica	Mt. Huanglongshan	460.9	446.72	25.7	1.32	5.01	15.23	2.23	109.97	35.63	1400	12.318	533.26	41.84	5.109	172	3.376	0.8732	8.295
Quercus wutaishanica	Mt. Huanglongshan	464.2	450.27	26.3	1.46	5.55	8.67	2.25	109.99	35.65	1530	12.318	533.26	41.84	5.109	172	3.376	0.8732	8.295
Quercus wutaishanica	Mt. Huanglongshan	468.7	453.96	29.1	1.26	5.05	7.43	1.7	109.99	35.65	1530	12.318	533.26	41.84	5.109	172	3.376	0.8732	8.295
Quercus wutaishanica	Mt. Huanglongshan	467.2	456.45	21.9	1.03	8.16	10.77	2.09	109.99	35.65	1530	12.318	533.26	41.84	5.109	172	3.376	0.8732	8.295
Quercus wutaishanica	Mt. Huanglongshan	469.3	457.48	24.4	1.69	9.48	8.04	2.55	110.02	35.67	1700	12.318	533.26	130	4.8	144	14.16	2.62	7.999
Quercus wutaishanica	Mt. Huanglongshan	464	450.98	24.8	1.28	8.97	10.98	2.42	110.02	35.67	1700	12.318	533.26	130	4.8	144	14.16	2.62	7.999
Quercus wutaishanica	Mt. Huanglongshan	470.2	457.97	25.4	1.25	6.51	8.73	3.46	110.02	35.67	1700	12.318	533.26	130	4.8	144	14.16	2.62	7.999
Quercus wutaishanica	Mt. Taiyueshan	469.9	460.06	21	0.99	5.32	12.76	1.68	111.85	36.41	1525	11.157	482.25	202	4.231	109.3	10.53	2.446	6.759
Quercus wutaishanica	Mt. Taiyueshan	480.6	472.25	21.3	0.97	4.43	7.82	1.48	111.85	36.41	1525	11.157	482.25	202	4.231	109.3	10.53	2.446	6.759
Quercus wutaishanica	Mt. Taiyueshan	464.9	454.02	21.5	0.89	6.19	11.83	2.03	111.85	36.41	1525	11.157	482.25	202	4.231	109.3	10.53	2.446	6.759
Quercus wutaishanica	Mt. Taiyueshan	480.1	471.49	21.7	0.52	2.79	11.54	2.94	111.85	36.41	1616	11.157	482.25	202	4.231	109.3	10.53	2.446	6.759
Quercus wutaishanica	Mt. Taiyueshan	475	465.54	21.8	1.03	8.93	11.38	1.21	111.85	36.41	1616	11.157	482.25	202	4.231	109.3	10.53	2.446	6.759
Quercus wutaishanica	Mt. Taiyueshan	459.9	447.8	22.2	0.98	7.98	13.31	3.4	111.85	36.41	1616	11.157	482.25	202	4.231	109.3	10.53	2.446	6.759
Quercus wutaishanica	Mt. Taiyueshan	472.8	462.2	23.3	0.83	6.52	9.8	2.06	111.87	36.42	1708	11.157	482.25	171.96	3.744	252.62	10.56	2.472	6.323
Quercus wutaishanica	Mt. Taiyueshan	476.4	466.31	23.5	1.73	9.23	10.13	1.12	111.87	36.42	1708	11.157	482.25	171.96	3.744	252.62	10.56	2.472	6.323
Quercus wutaishanica	Mt. Taiyueshan	482.5	473.37	23.7	1.28	7.08	6.2	1.18	111.87	36.42	1708	11.157	482.25	171.96	3.744	252.62	10.56	2.472	6.323
Quercus wutaishanica	Mt. Taiyueshan	468.7	457.63	22.9	0.94	6.46	18.34	1.76	111.87	36.44	2015	11.157	482.25	171.96	3.744	252.62	10.56	2.472	6.323
Quercus wutaishanica	Mt. Taiyueshan	476.8	466.68	23.7	1.15	6.16	9.37	2.43	111.87	36.44	2015	11.157	482.25	171.96	3.744	252.62	10.56	2.472	6.323
Quercus wutaishanica	Mt. Taiyueshan	467.4	455.53	23.9	1.04	7.07	11.22	3.65	111.87	36.44	2015	11.157	482.25	171.96	3.744	252.62	10.56	2.472	6.323
Quercus wutaishanica	Mt. Taiyueshan	471.5	460.13	24.3	1.31	6.49	10.27	2.21	111.87	36.44	2115	11.157	482.25	171.96	3.744	252.62	10.56	2.472	6.323
Quercus wutaishanica	Mt. Taiyueshan	471.7	460.14	24.7	1.16	7.66	11.55	1.34	111.87	36.44	2115	11.157	482.25	171.96	3.744	252.62	10.56	2.472	6.323
Quercus wutaishanica	Mt. Taiyueshan	482.9	473.25	25	1.11	7.18	9.69	1.67	111.87	36.44	2115	11.157	482.25	171.96	3.744	252.62	10.56	2.472	6.323
Quercus wutaishanica	Mt. Taiyueshan	473.5	462	25.2	1.31	6.16	10.11	2.34	111.87	36.44	2222	11.157	482.25	171.96	3.744	252.62	10.56	2.472	6.323
Quercus wutaishanica	Mt. Taiyueshan	463.9	450.55	25.3	1.1	7.04	9.3	1.79	111.87	36.44	2222	11.157	482.25	171.96	3.744	252.62	10.56	2.472	6.323
Quercus wutaishanica	Mt. Taiyueshan	479.9	469.4	25.6	1.15	7.15	11.81	1.74	111.87	36.44	2222	11.157	482.25	171.96	3.744	252.62	10.56	2.472	6.323
Quercus wutaishanica	Mt. Taiyueshan	463.3	450.58	24.1	1.12	6.31	14.75	3.09	111.88	36.43	1808	11.157	482.25	118	6.328	143	14.16	2.62	8.302
Quercus wutaishanica	Mt. Taiyueshan	478.5	467.49	26.1	1.01	5.21	7.34	2.62	111.88	36.43	1808	11.157	482.25	118	6.328	143	14.16	2.62	8.302
Quercus wutaishanica	Mt. Taiyueshan	478.8	466.88	28	1.14	8.1	10.86	2.84	111.88	36.43	1808	11.157	482.25	118	6.328	143	14.16	2.62	8.302
Quercus wutaishanica	Mt. Taiyueshan	483.3	471.95	28.8	1.48	6.96	5.43	1.16	111.88	36.43	1810	11.157	482.25	118	6.328	143	14.16	2.62	8.302
Quercus wutaishanica	Mt. Taiyueshan	478.3	464.4	31.5	1.37	8.57	8.75	2.61	111.88	36.43	1810	11.157	482.25	118	6.328	143	14.16	2.62	8.302
Quercus wutaishanica	Mt. Taiyueshan	480.8	467.2	32.1	1.47	9.46	8.09	2.37	111.88	36.43	1810	11.157	482.25	118	6.328	143	14.16	2.62	8.302
Quercus wutaishanica	Mt. Taiyueshan	468.1	458.65	19.8	0.98	7.11	14.45	2.56	111.88	36.44	1914	11.157	482.25	118	6.328	143	14.16	2.62	8.302
Quercus wutaishanica	Mt. Taiyueshan	472	462.22	21.5	0.91	5.67	12.88	1.54	111.88	36.44	1914	11.157	482.25	118	6.328	143	14.16	2.62	8.302
Quercus wutaishanica	Mt. Taiyueshan	474.8	465	22.4	1.04	6.07	11.6	1.88	111.88	36.44	1914	11.157	482.25	118	6.328	143	14.16	2.62	8.302
Quercus wutaishanica	Mt. Taiyueshan	463.3	453.12	19.9	0.92	5.74	13.38	2.39	111.99	36.61	1478	11.157	482.25	59.37	3	84.54	2.184	1.006	7.515
Quercus wutaishanica	Mt. Taiyueshan	477.2	468.8	20.3	0.8	4.03	7.67	2.97	111.99	36.61	1478	11.157	482.25	59.37	3	84.54	2.184	1.006	7.515
Quercus wutaishanica	Mt. Taiyueshan	465.3	455.06	20.5	1.2	6.78	11.1	1.99	111.99	36.61	1478	11.157	482.25	59.37	3	84.54	2.184	1.006	7.515
Quercus wutaishanica	Mt. Taihangshan	472.3	458.83	28.3	1.25	5.23	9.26	2.49	113.48	37.11	1509	8.0458	522.4	24	2	101	3.376	0.57	7.95
Quercus wutaishanica	Mt. Taihangshan	477.9	465.63	28.3	1.23	6.44	8.4	1.29	113.48	37.11	1509	8.0458	522.4	24	2	101	3.376	0.57	7.95
Quercus wutaishanica	Mt. Taihangshan	472.7	465	17.6	0.83	6.51	13	2.5	113.48	37.11	1509	8.0458	522.4	24	2	101	3.376	0.57	7.95
Quercus wutaishanica	Mt. Taihangshan	466.4	457.43	18.5	0.97	4.64	16.62	2.88	113.48	37.11	1608	8.0458	522.4	24	2	101	3.376	0.57	7.95
Quercus wutaishanica	Mt. Taihangshan	479.6	471.5	20.4	0.85	5.84	8.76	2.5	113.48	37.11	1608	8.0458	522.4	24	2	101	3.376	0.57	7.95
Quercus wutaishanica	Mt. Taihangshan	469.1	459.25	20.8	0.95	7.02	10.5	1.67	113.48	37.11	1608	8.0458	522.4	24	2	101	3.376	0.57	7.95
Quercus wutaishanica	Mt. Taihangshan	476.2	465.62	24.4	1.35	10.88	11.27	2.57	113.49	37.13	1918	8.0458	522.4	24	2	101	3.376	0.57	7.95
Quercus wutaishanica	Mt. Taihangshan	478.4	466.19	28.4	1.77	8.78	8.66	1.63	113.49	37.13	1918	8.0458	522.4	24	2	101	3.376	0.57	7.95
Quercus wutaishanica	Mt. Taihangshan	463.8	450.43	25.3	1.16	7.3	10.43	2.87	113.49	37.13	1918	8.0458	522.4	24	2	101	3.376	0.57	7.95
Quercus wutaishanica	Mt. Taihangshan	470.6	459.95	22.7	1.02	5.71	12.86	2.62	113.5	37.13	1707	8.0458	522.4	24	2	101	3.376	0.57	7.95
Quercus wutaishanica	Mt. Taihangshan	483.2	474.42	23.2	1.32	8.58	6.27	2.52	113.5	37.13	1707	8.0458	522.4	24	2	101	3.376	0.57	7.95
Quercus wutaishanica	Mt. Taihangshan	472.2	461.23	23.8	1.81	10.09	7.8	1.75	113.5	37.13	1707	8.0458	522.4	24	2	101	3.376	0.57	7.95

## Sheet: Leaf_tratis_by_forests
Sites	Forest_types	No._species	C	CS	N	P	K	Ca	Mg	C_SE	CS_SE	N_SE	P_SE	K_SE	Ca_SE	Mg_SE	Longitude	Latitude	MAT	MAP	AN	AP	AK	Ca2+	Mg2+	pH
Mt. Guandishan	DBF	13	462.348	448.162	26.3685	1.68308	13.1062	13.5262	3.08769	5.62593	6.55267	1.04817	0.170186	1.21885	1.40477	0.217645	111.45	37.85	7.4104	442.3	171.96	6	165.77	10.8	2.472	6.282
Mt. Guanshan	DBF	12	458.162	445.675	22.8008	1.56333	10.2525	15.1392	3.195	5.37654	5.85151	1.4958	0.155092	1.02802	1.53719	0.342142	106.65	34.75	8.8538	545.81	396.3	16.15	171.75	11.04	3.643	6.186
Mt. Huanglongshan	DBF	13	464.551	452.369	23.6038	1.24077	11.5046	16.8815	2.82615	5.52136	6.47275	1.27482	0.0515461	1.04797	1.39125	0.164311	110.11	35.75	12.318	533.26	32.32	4	147	3.376	0.8732	8.202
Mt. Luyashan	DBF	40	456.498	441.36	26.404	1.423	12.049	16.164	2.82	6.02015	6.81593	1.29937	0.0624153	1.15017	2.06094	0.132094	111.75	38.71	5.5033	437.98	290.64	4.61	134.08	5.228	1.426	6.681
Mt. Taibaishan	DBF	45	467.527	456.662	22.2462	1.10889	10.8236	15.2438	3.05178	2.0257	2.3148	0.547324	0.0634116	0.546965	0.609682	0.144441	107.55	33.91	10.526	644.46	332.92	6	149.2	9.083	1.691	5.995
Mt. Taihangshan	DBF	13	467.723	457.485	21.4262	0.985385	9.44385	16.5631	2.85077	4.35615	4.78508	0.86652	0.0573743	0.668734	1.45622	0.180244	113.63	37.2	8.0458	522.4	42.93	3.3	126	3.376	0.57	6.7
Mt. Taiyueshan	DBF	16	467.821	454.856	26.2169	1.17375	12.1794	12.7544	2.77313	4.5827	5.30061	0.857318	0.061352	1.09475	1.34264	0.127154	111.99	36.63	11.157	482.25	171.96	5.569	96.72	10.8	2.41	6.676
Mt. Ziwuling	DBF	15	469.409	460.127	20.022	1.024	10.2787	17.0787	2.86667	4.0019	4.44327	0.653783	0.0524341	0.83232	1.66127	0.185356	108.25	36	9.6713	478.47	25.2	3.81	145.08	4.2	0.95	8.282
Mt. Dinghu	EBF	37	474.698	466.16	18.9408	0.958932	9.16995	10.4169	2.08484	5.2039	6.03438	1.09838	0.0484373	0.740326	0.886341	0.150214	112.35	23.08	21.521	1754.7	164.42	9.417	63.21	3.503	0.6781	5.553
Mt. Jianfeng	EBF	14	487.875	481.216	17.0168	0.577414	9.20367	4.6296	2.21346	9.66289	11.4532	2.09337	0.0622204	0.807867	0.408183	0.21395	109.1	18.85	25.182	2127.4	128.55	4.746	114.37	0.5	0.2245	4.881
Mt. Wutong	EBF	21	477.141	469.437	19.0239	1.11263	9.04628	12.6112	2.05119	5.35749	6.06094	1.67299	0.137323	1.17192	1.24067	0.258707	114.18	22.4	23.078	1894.2	83.83	4.573	50.2	0.4781	0.0836	5.268
Xishuangbanna	EBF	13	488.36	482.153	18.499	1.12114	11.2345	6.77225	3.14323	5.67334	6.37127	1.79573	0.117071	1.74255	1.13866	0.27405	101.25	21.41	21.913	1407.5	87.12	4.413	40	0.3387	0.2138	5.326
Chenqi village	MDEBF	47	462.296	450.474	21.5781	1.18213	11.4302	18.1849	3.30979	2.7762	3.42467	1.01332	0.0550359	0.662548	1.00956	0.257835	105.7	26.25	16.359	1129.5	99	2.088	170	0.52	0.1992	6.351
Houzhai village	MDEBF	20	448.781	436.249	20.2806	1.12792	13.5073	20.2334	3.31667	5.96271	6.68895	1.37812	0.0719231	1.54891	2.22905	0.303941	105.75	26.2	15.984	1115.1	160	9	101	12.35	1.301	7.246
Mt. Tianlongshan	MDEBF	16	452.132	440.193	19.6357	1.11804	11.2885	20.5241	3.69283	2.89815	3.43269	0.848478	0.0448472	0.749469	0.938218	0.204115	105.75	26.22	15.984	1115.1	132.32	7.39	74.7	3.067	0.8619	6.484

## Sheet: Cellwall_components_20species
Species	Genus	Family	Plant_form	Site	Location	MAT and MAP	Parent material	Karst_nonKarst	C	Ca	TotalCW	Lignin	Celloluse	Hemicelloluse	Protopectin	Water_soluable_pectin	Total_pectin	CaCW	CCW	Lignin_R	Celloluse_R	Hemicelloluse_R	Protopectin_R	Soluble_pectin_R	Total_pectin_R	CaCW_R	CCW_R	SLA
Camptotheca acuminata	Camptotheca	Nyssaceae	Deciduous tree	Qianyanzhou	115.05°E, 26.73°N	18.0℃, 1509mm	red sandstone, sandstone	nonkarst	453.5	14.85	195.856	90	43.8619	19.4512	28.3392	6.03911	34.3783	6.43062	94.0576	45.9521	22.395	9.93138	14.4694	3.08344	17.5529	3.28334	48.0238	17.233
Carpinus pubescens	Carpinus	Betulaceae	Deciduous tree	Mt. Tianlongshan	105.75°E, 26.20°N	16.0℃, 1115mm	limestone, dolomite	karst	446.1	24.88	386.366	170.887	94.5841	64.6759	29.0277	17.5997	46.6274	7.49954	202.113	44.2293	24.4804	16.7395	7.51301	4.55518	12.0682	1.94104	52.3111	15.162
Castanea mollissima	Castanea	Fagaceae	Deciduous tree	Qianyanzhou	115.05°E, 26.73°N	18.0℃, 1509mm	red sandstone, sandstone	nonkarst	451.2	14.12	362.287	130.13	104.053	87.1524	25.1843	10.0396	35.2239	4.62232	183.918	35.9189	28.7211	24.0561	6.95148	2.77118	9.72265	1.27587	50.7657	13.642
Castanopsis fabri	Castanopsis	Fagaceae	Evergreen tree	Qianyanzhou	115.05°E, 26.73°N	18.0℃, 1509mm	red sandstone, sandstone	nonkarst	446.44	13.2	338.436	165.869	71.8927	56.1943	27.3111	10.7909	38.1019	5.80159	179.25	49.0104	21.2426	16.6041	8.06979	3.18845	11.2582	1.71424	52.9641	15.236
Celtis bodinieri	Celtis	Cannabaceae	Deciduous tree	Mt. Tianlongshan	105.75°E, 26.20°N	16.0℃, 1115mm	limestone, dolomite	karst	445	21.38	289.933	80.1126	90.9308	68.1756	28.6329	13.2686	41.9015	7.25404	139.146	27.6314	31.3627	23.5143	9.87571	4.57645	14.4522	2.50197	47.9926	23.15
Cerasus pseudocerasus	Cerasus	Rosaceae	Deciduous tree	Mt. Tianlongshan	105.75°E, 26.20°N	16.0℃, 1115mm	limestone, dolomite	karst	450.2	28.62	317.428	109.588	89.7386	58.2691	34.9751	12.6935	47.6686	8.87973	156.733	34.5237	28.2706	18.3566	11.0183	3.99888	15.0171	2.7974	49.3761	20.091
Corymbia citriodora	Corymbia	Myrtaceae	Evergreen tree	Qianyanzhou	115.05°E, 26.73°N	18.0℃, 1509mm	red sandstone, sandstone	nonkarst	463.2	9.02	182.881	63.2434	54.3367	36.8159	17.2951	7.78236	25.0775	3.09608	85.9838	34.5818	29.7116	20.1311	9.45705	4.25543	13.7125	1.69295	47.0164	16.832
Cyclobalanopsis augustinii	Cyclobalanopsis	Fagaceae	Evergreen tree	Mt. Tianlongshan	105.75°E, 26.20°N	16.0℃, 1115mm	limestone, dolomite	karst	469.1	16.3	312.124	166.271	60.7258	49.029	18.8567	13.805	32.6617	2.91637	167.876	53.2707	19.4557	15.7082	6.0414	4.42293	10.4643	0.934362	53.7851	12.523
Cyclobalanopsis glauca	Cyclobalanopsis	Fagaceae	Evergreen tree	Qianyanzhou	115.05°E, 26.73°N	18.0℃, 1509mm	red sandstone, sandstone	nonkarst	473.15	9.28	401.854	195.718	93.4011	74.1112	23.7518	10.333	34.0848	4.04308	214.815	48.7038	23.2425	18.4423	5.91056	2.57133	8.48189	1.00611	53.456	10.231
Itea ilicifolia	Itea	Iteaceae	Evergreen tree	Mt. Tianlongshan	105.75°E, 26.20°N	16.0℃, 1115mm	limestone, dolomite	karst	461	19.53	339.306	130.498	85.9615	51.4369	39.2542	25.3885	64.6427	6.07332	174.679	38.4603	25.3345	15.1594	11.569	7.48246	19.0514	1.78992	51.4813	16.895
Liquidambar formosana	Liquidambar	Altingiaceae	Deciduous tree	Qianyanzhou	115.05°E, 26.73°N	18.0℃, 1509mm	red sandstone, sandstone	nonkarst	474	10.56	235.925	131.924	42.0299	36.3637	12.6313	7.39041	20.0217	4.58901	124.476	55.9178	17.815	15.4133	5.35396	3.13253	8.48649	1.94512	52.7611	15.561
Machilus cavaleriei	Machilus	Lauraceae	Evergreen tree	Mt. Tianlongshan	105.75°E, 26.20°N	16.0℃, 1115mm	limestone, dolomite	karst	499	6.18	363.25	199.269	82.2797	50.1082	16.7222	10.4265	27.1487	3.81601	197.039	54.8574	22.651	13.7944	4.6035	2.87034	7.47384	1.05052	54.2434	8.794
Machilus microcarpa	Machilus	Lauraceae	Evergreen tree	Mt. Tianlongshan	105.75°E, 26.20°N	16.0℃, 1115mm	limestone, dolomite	karst	494.1	12.81	346.697	195.949	59.1499	53.7878	18.8049	12.8552	31.6601	5.25759	188.357	56.5187	17.061	15.5144	5.42402	3.70791	9.13193	1.51648	54.3289	13.948
Melia azedarach	Melia	Meliaceae	Deciduous tree	Qianyanzhou	115.05°E, 26.73°N	18.0℃, 1509mm	red sandstone, sandstone	nonkarst	482	9.85	352.648	159.034	99.7927	38.4477	31.4057	20.4485	51.8542	3.11698	187.001	45.0969	28.2981	10.9026	8.90567	5.79855	14.7042	0.883877	53.0276	16.562
Michelia figo	Michelia	Magnoliaceae	Evergreen tree	Qianyanzhou	115.05°E, 26.73°N	18.0℃, 1509mm	red sandstone, sandstone	nonkarst	512.36	4.38	324.257	186.516	52.2601	63.0075	14.8165	5.47835	20.2949	1.56006	177.267	57.5209	16.1169	19.4313	4.56938	1.68951	6.25889	0.481119	54.6687	12.368
Pittosporum brevicalyx	Pittosporum	Pittosporaceae	Evergreen tree	Mt. Tianlongshan	105.75°E, 26.20°N	16.0℃, 1115mm	limestone, dolomite	karst	451.7	16.69	228.604	47.8519	77.097	54.9588	27.7128	11.0377	38.7506	8.7245	102.061	20.9323	33.7252	24.0411	12.1227	4.82833	16.951	3.81643	44.6456	22.569
Platycarya strobilacea	Platycarya	Juglandaceae	Deciduous tree	Mt. Tianlongshan	105.75°E, 26.20°N	16.0℃, 1115mm	limestone, dolomite	karst	447.5	26.75	291.363	131.617	52.0543	64.9825	22.764	12.886	35.6501	6.08957	150.041	45.1729	17.8658	22.3029	7.81295	4.42268	12.2356	2.09003	51.4963	16.028
Rhamnus martini	Rhamnus	Rhamnaceae	Deciduous tree	Mt. Tianlongshan	105.75°E, 26.20°N	16.0℃, 1115mm	limestone, dolomite	karst	427.7	32.46	358.909	119.621	113.903	63.0187	35.3369	15.297	50.6339	9.04444	179.008	33.3292	31.7358	17.5584	9.84565	4.26207	14.1077	2.51998	49.8756	19.615
Schima superba	Schima	Theaceae	Evergreen tree	Qianyanzhou	115.05°E, 26.73°N	18.0℃, 1509mm	red sandstone, sandstone	nonkarst	490	5.21	207.09	89.5344	46.6017	45.31	15.0299	7.93031	22.9602	2.09917	103.681	43.2346	22.5032	21.8794	7.25769	3.82941	11.0871	1.01365	50.0659	14.184
Toona sinensis	Toona	Meliaceae	Deciduous tree	Qianyanzhou	115.05°E, 26.73°N	18.0℃, 1509mm	red sandstone, sandstone	nonkarst	463.8	15.77	246.893	90.2034	79.667	39.8323	22.8303	8.51436	31.3447	5.42247	121.337	36.5355	32.2679	16.1334	9.24705	3.4486	12.6957	2.19628	49.1456	15.855
